# Supplementary material for: 2-Hydroxyphenyl benzimidazoles and their boron complexes: synthesis, structure, aggregation-induced emission and picric acid sensing
Source: Royal Society of Chemistry journal article supplement (doi:10.1039/d3dt01199b), 2023-01-01
Supplement: d3dt01199b1.pdf [file d3dt01199b1.pdf]

## Supporting Information

### 2-Hydroxyphenyl Benzimidazoles and their Boron Complexes: Synthesis, Structure, Aggregation-Induced Emission and Picric acid Sensing

Ramar Arumugam,<sup>a</sup> Prakash Nayak,<sup>b</sup> Bijoy Dey,<sup>a</sup> Ramkumar Kannan,<sup>a</sup> Krishnan Venkatasubbaiah <sup>\*b</sup> and Vadapalli Chandrasekhar. <sup>\*a,c</sup>

- Tata Institute of Fundamental Research Hyderabad, Gopanally, Hyderabad-500 046, Telangana, India
- School of Chemical Sciences, National Institute of Science Education and Research (NISER), Bhubaneswar-752050, Orissa (India). Tel: 091-6742494165. E-mail: krishv@niser.ac.in
- Department of Chemistry, Indian Institute of Technology Kanpur, Kanpur-208 016, Uttar Pradesh, India. E-mail: vc@iitk.ac.in; vc@tifrh.res.in

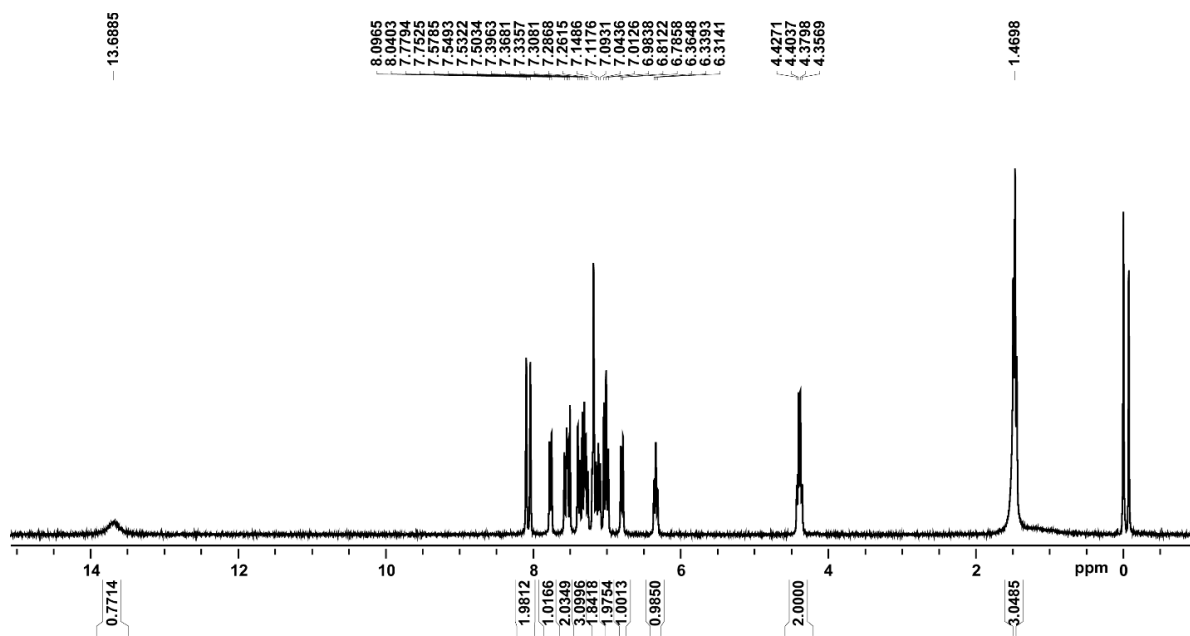

Fig. S1a. <sup>1</sup>H NMR spectrum of L1 in CDCl<sub>3</sub>

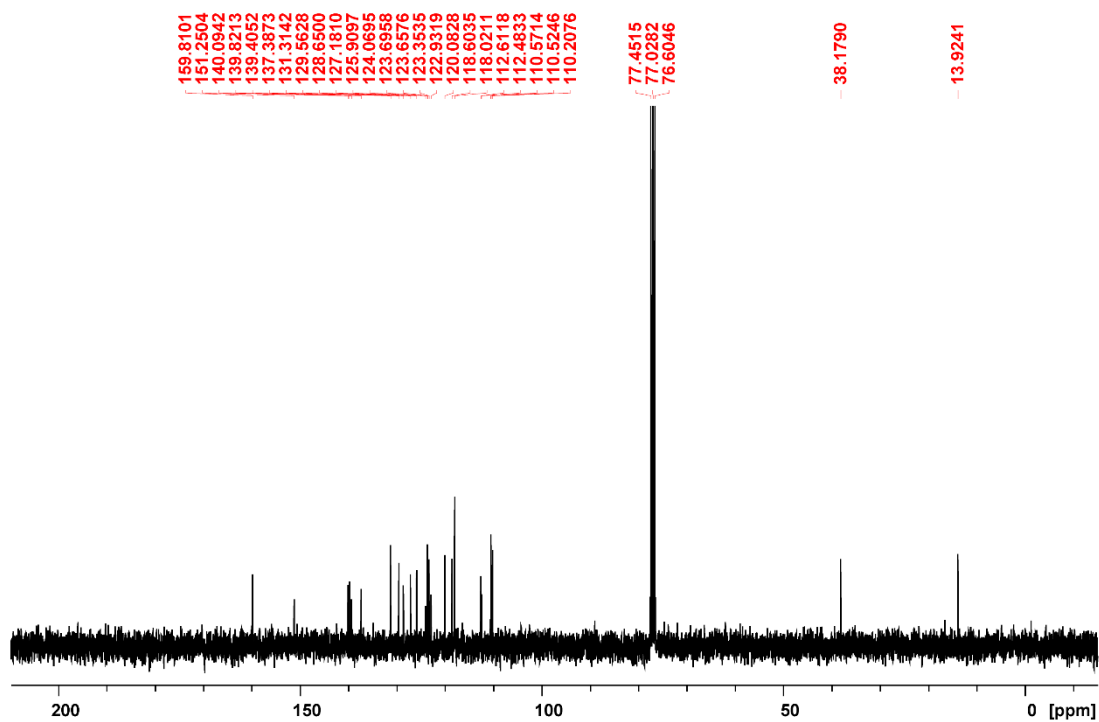

Fig. S1b.  $^{13}\text{C}$  NMR spectrum of L1 in  $\text{CDCl}_3$

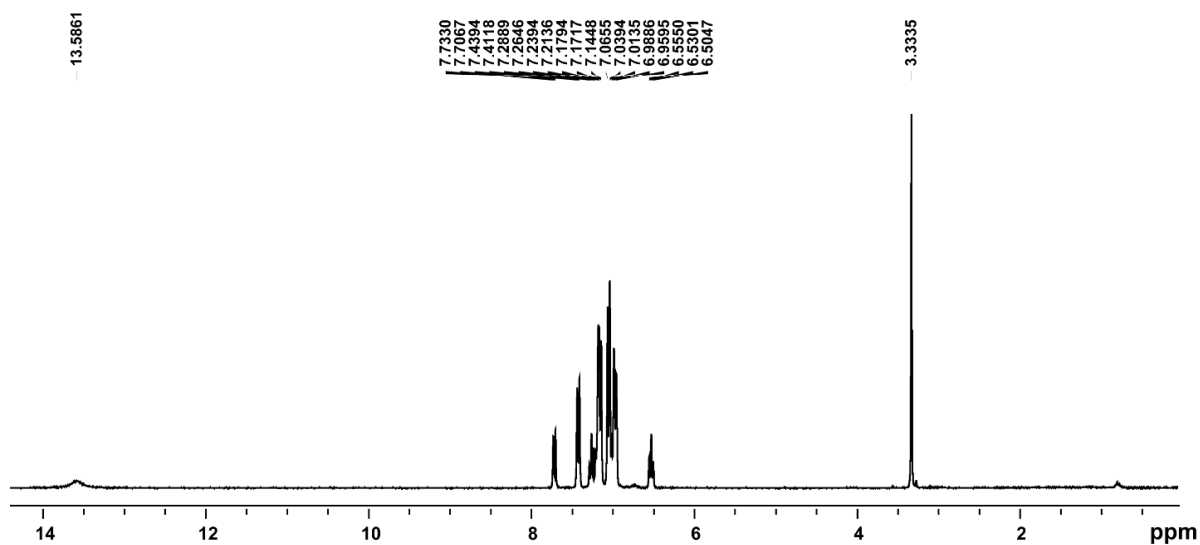

Fig. S2a.  $^1\text{H}$  NMR spectrum of L2 in  $\text{CDCl}_3$

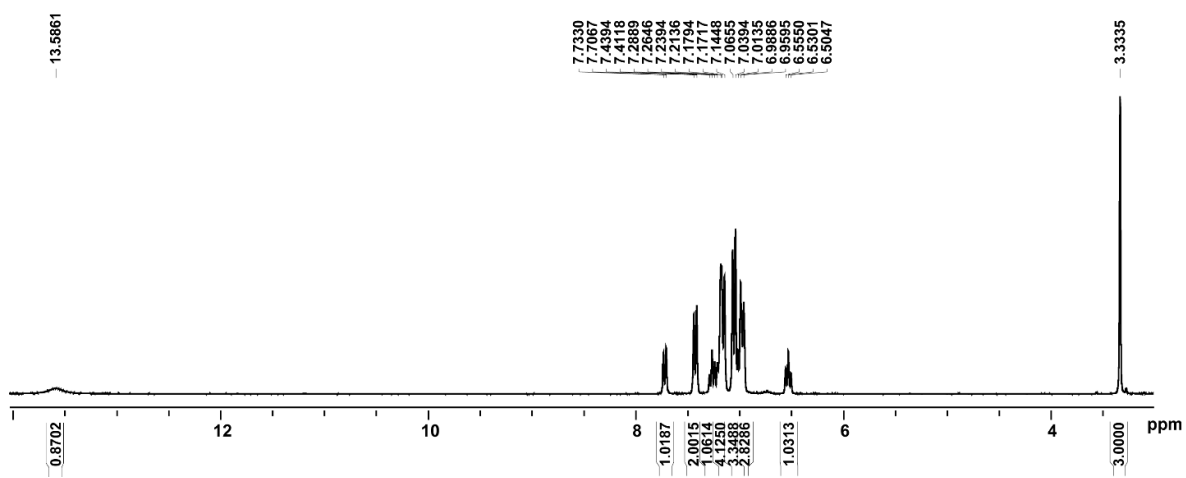

Fig. S2b. Partial  $^1\text{H}$  NMR spectrum of **L2** in  $\text{CDCl}_3$

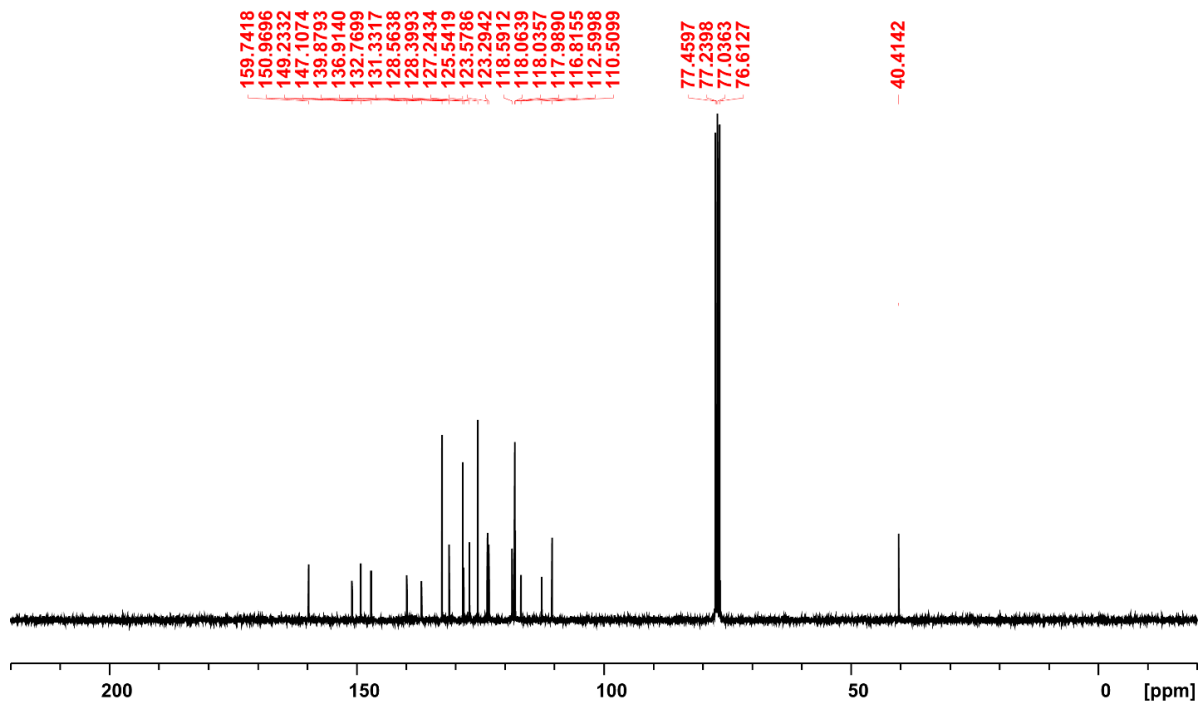

Fig. S2c.  $^{13}\text{C}$  NMR spectrum of **L2** in  $\text{CDCl}_3$

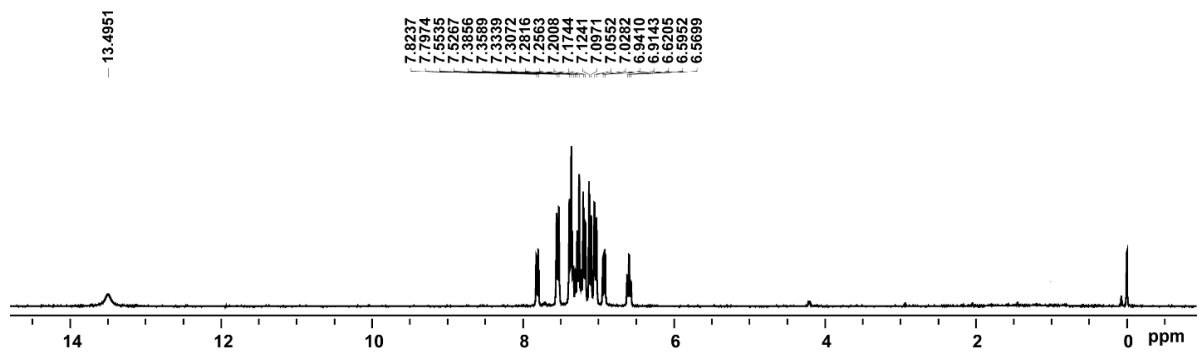

Fig. S3a.  $^1\text{H}$  NMR spectrum of **L3** in  $\text{CDCl}_3$

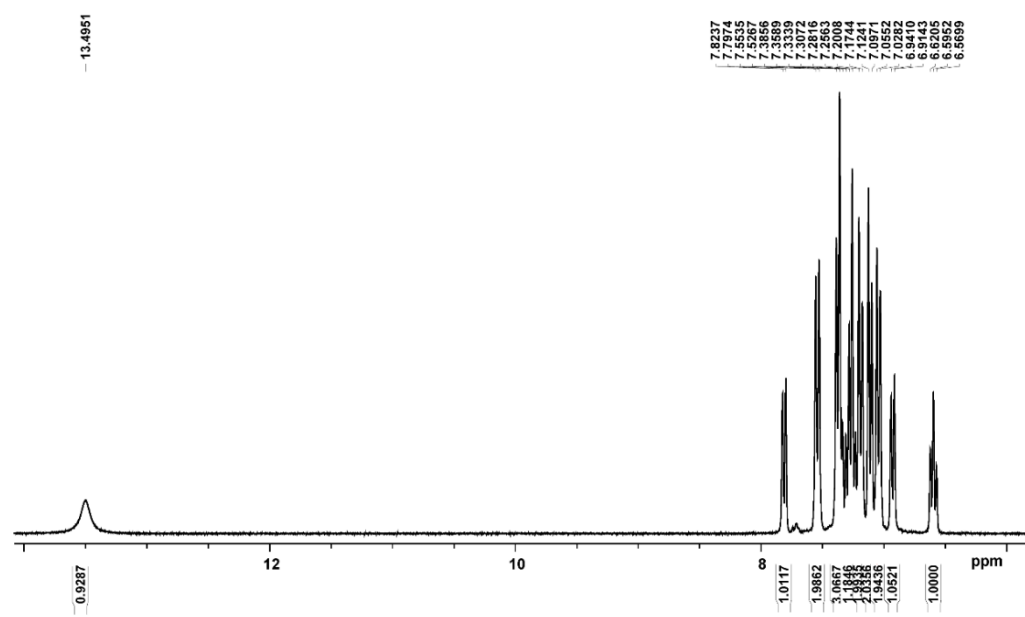

Fig. S3b. Partial  $^1\text{H}$  NMR spectrum of **L3** in  $\text{CDCl}_3$

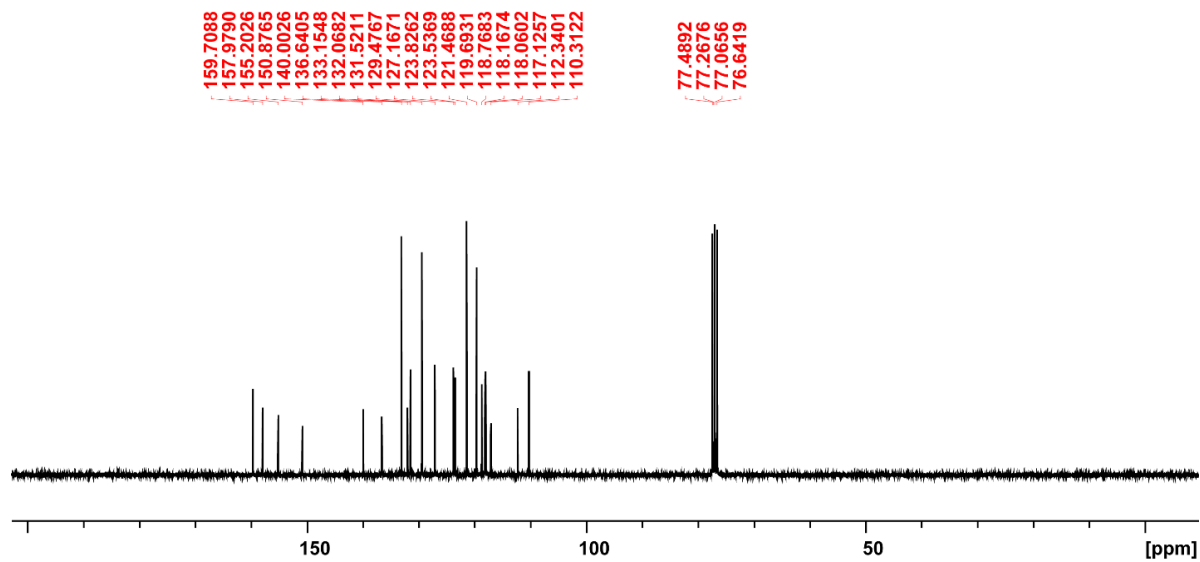

Fig. S3c.  $^{13}\text{C}$  NMR spectrum of **L3** in  $\text{CDCl}_3$

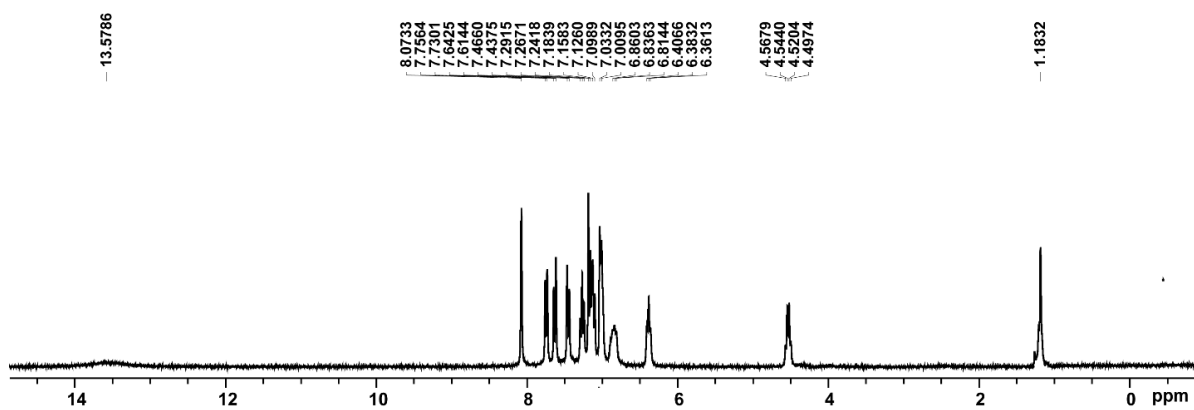

Fig. S4a.  $^1\text{H}$  NMR spectrum of **L4** in  $\text{CDCl}_3$

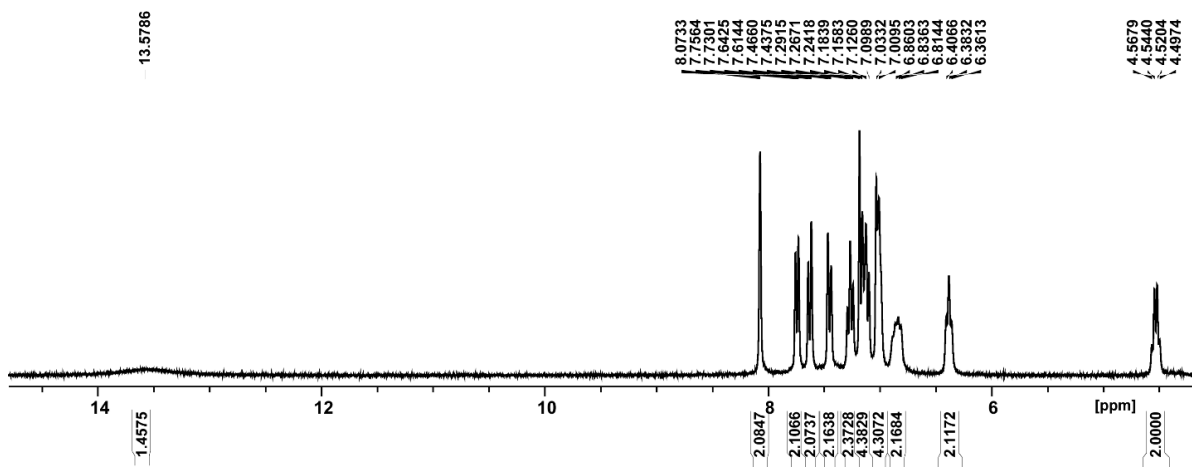

Fig. S4b. Partial  $^1\text{H}$  NMR spectrum of **L4** in  $\text{CDCl}_3$

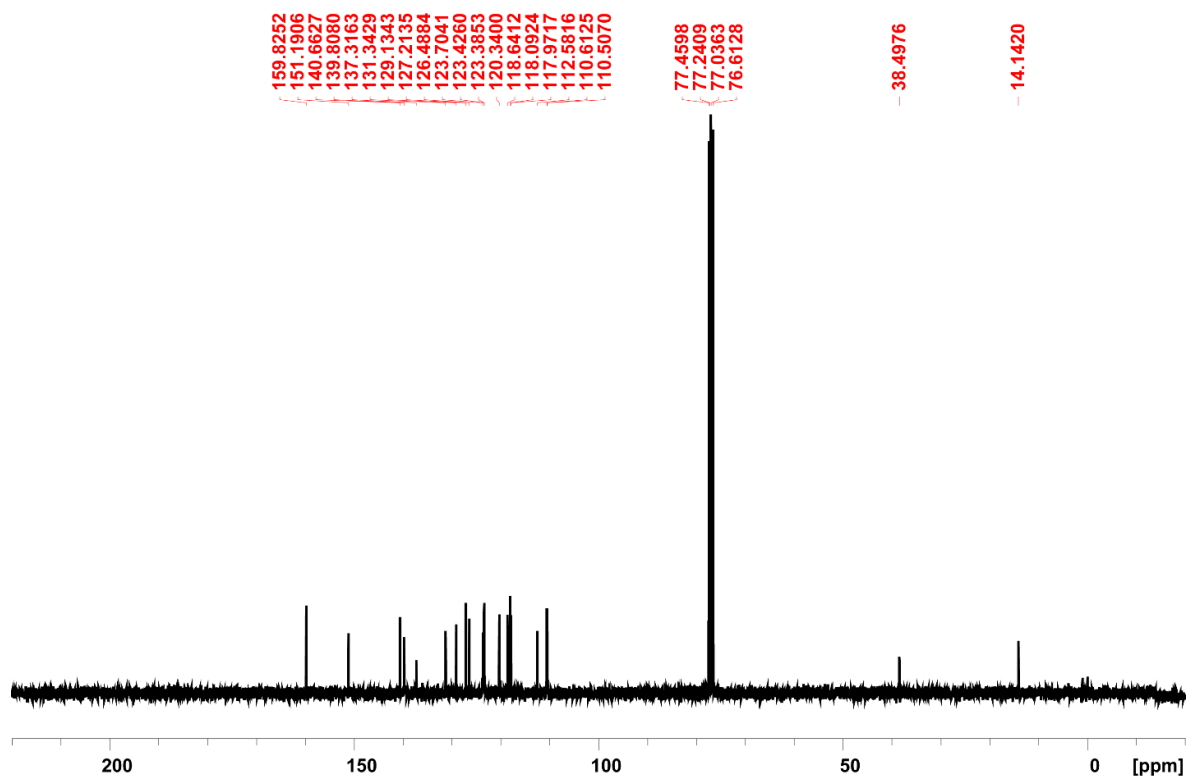

Fig. S4c.  $^{13}\text{C}$  NMR spectrum of **L4** in  $\text{CDCl}_3$

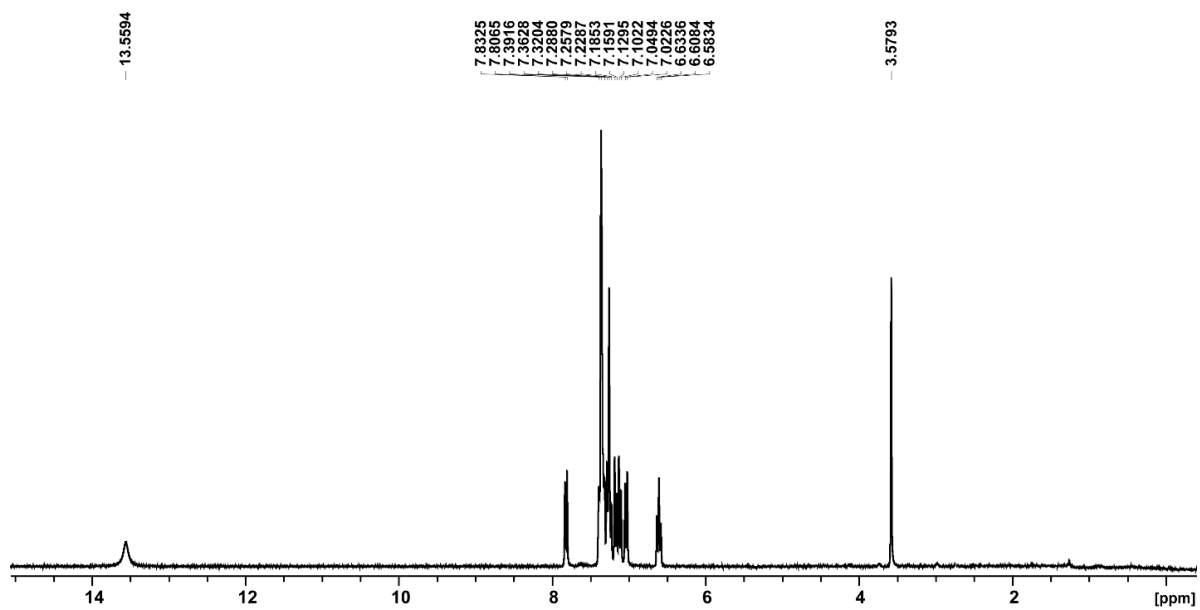

Fig. S5a.  $^1\text{H}$  NMR spectrum of L5 in  $\text{CDCl}_3$

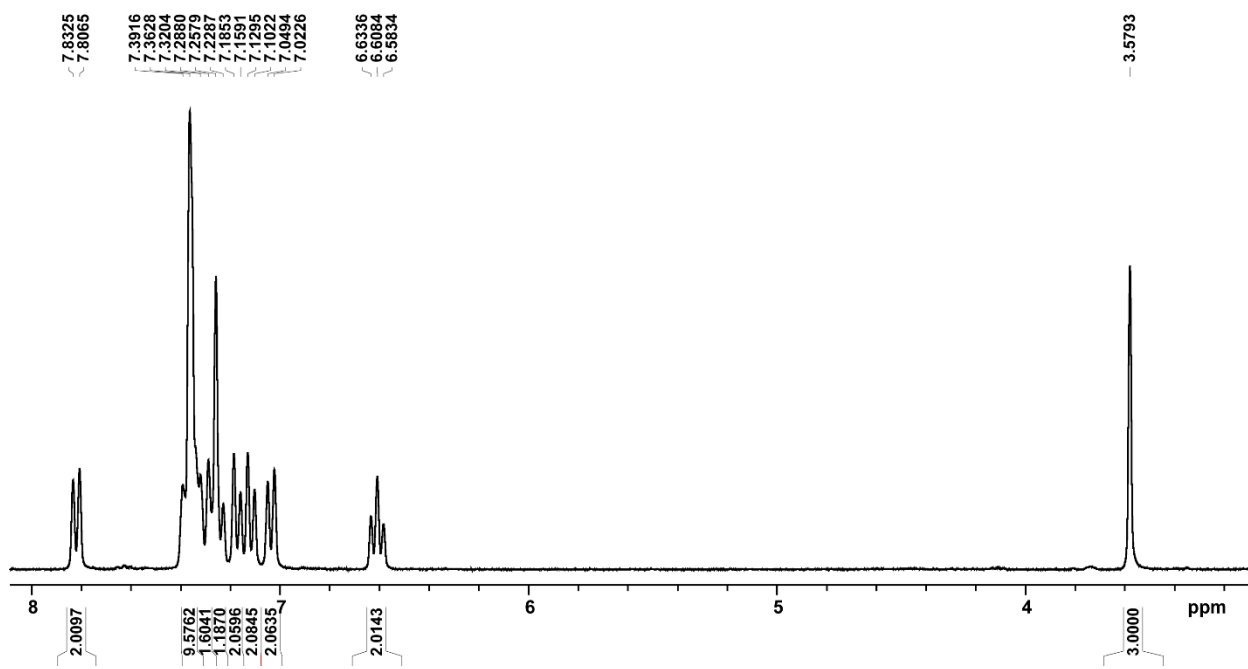

Fig. S5b. Partial  $^1\text{H}$  NMR spectrum of L5 in  $\text{CDCl}_3$

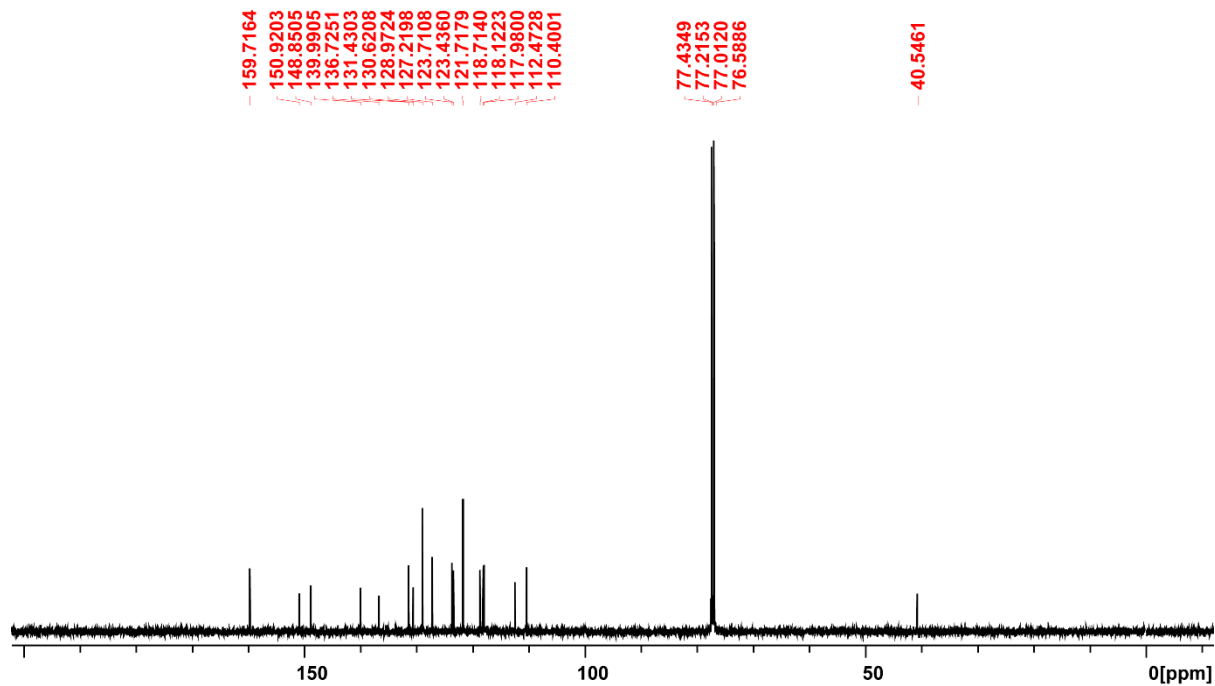

Fig. S5c.  $^{13}\text{C}$  NMR spectrum of L5 in  $\text{CDCl}_3$

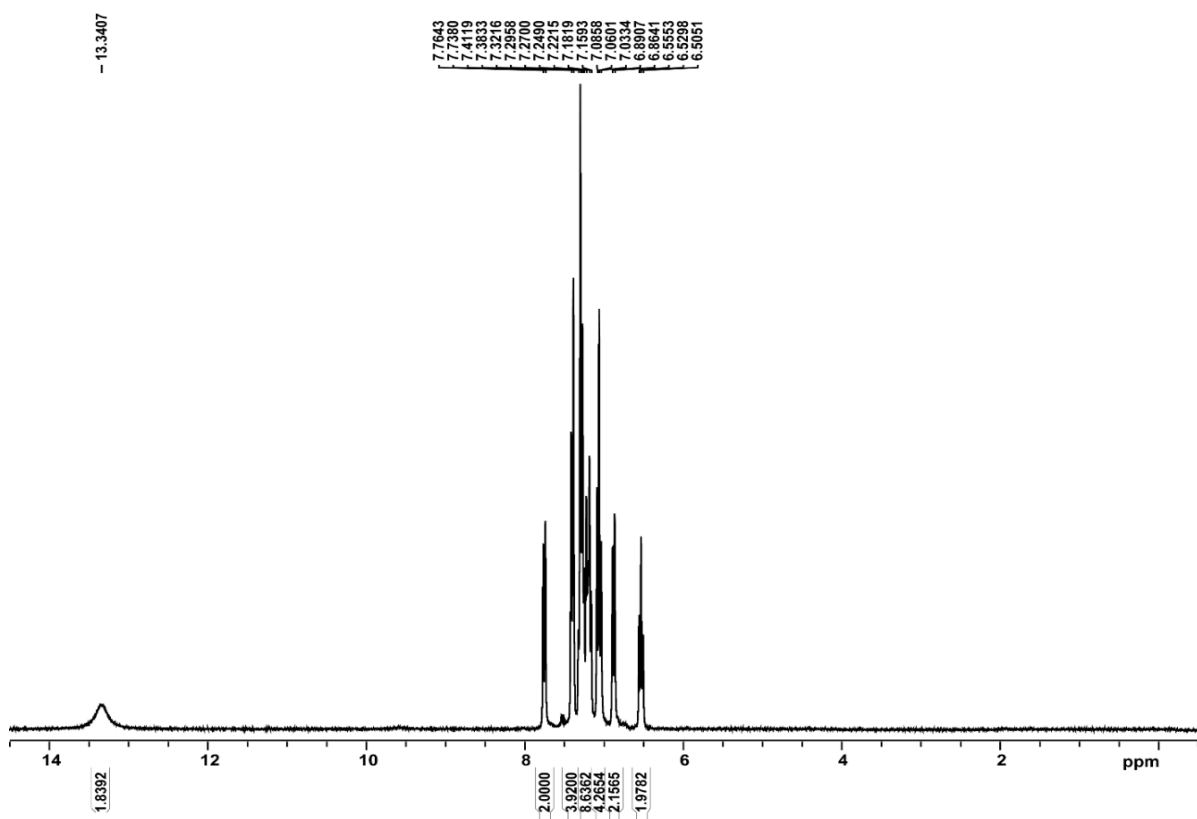

Fig. S6a.  $^1\text{H}$  NMR spectrum of L6 in  $\text{CDCl}_3$



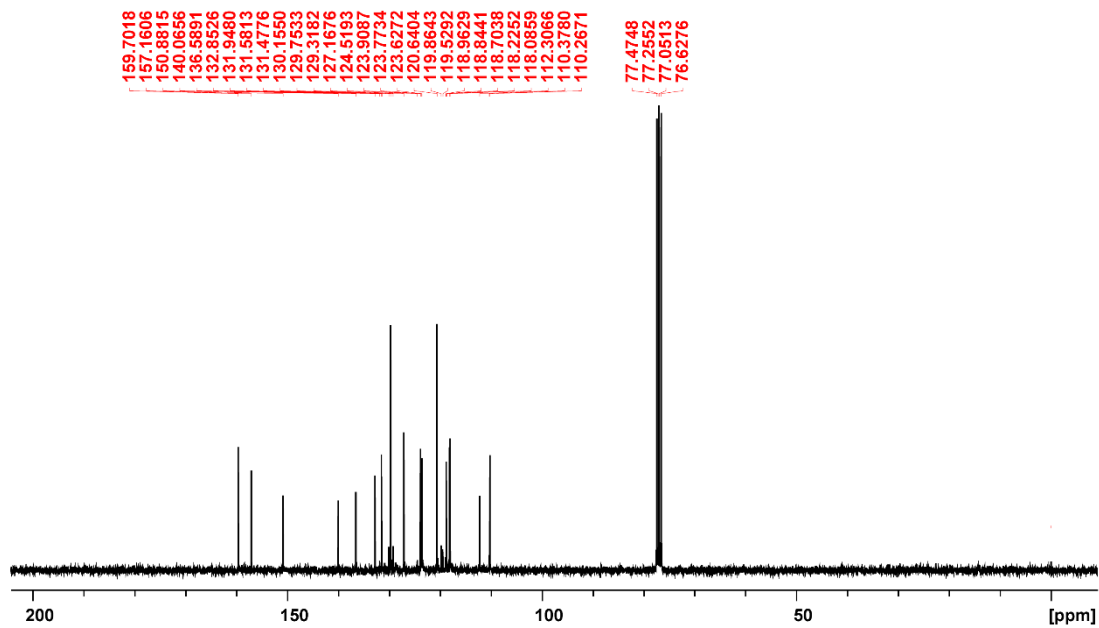

Fig. S6b. <sup>13</sup>C NMR spectrum of L6 in CDCl<sub>3</sub>

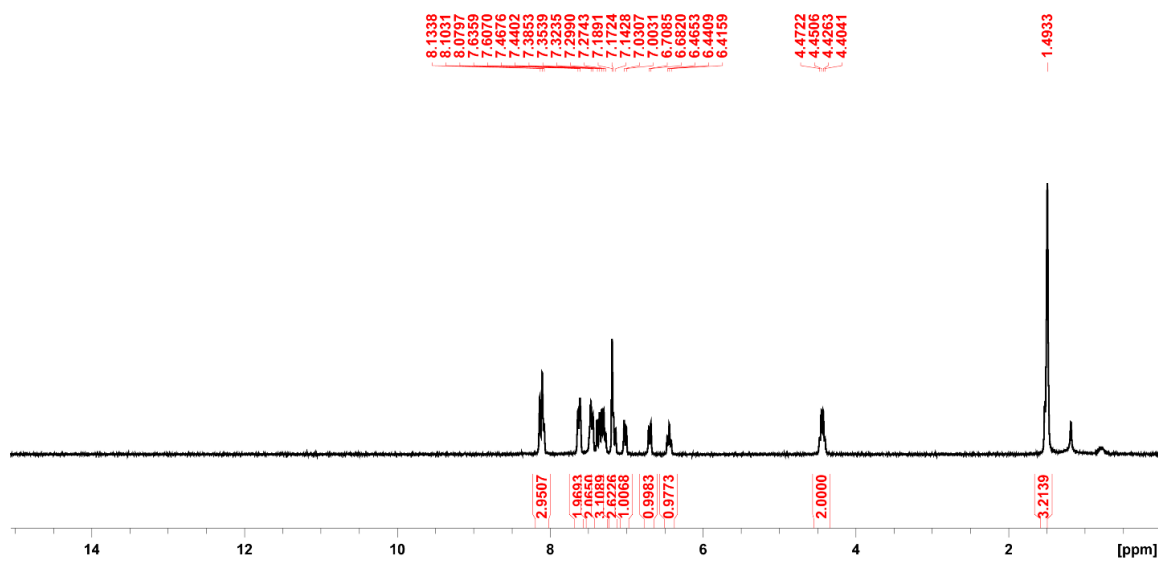

Fig. S7a. <sup>1</sup>H NMR spectrum of 1 in CDCl<sub>3</sub>

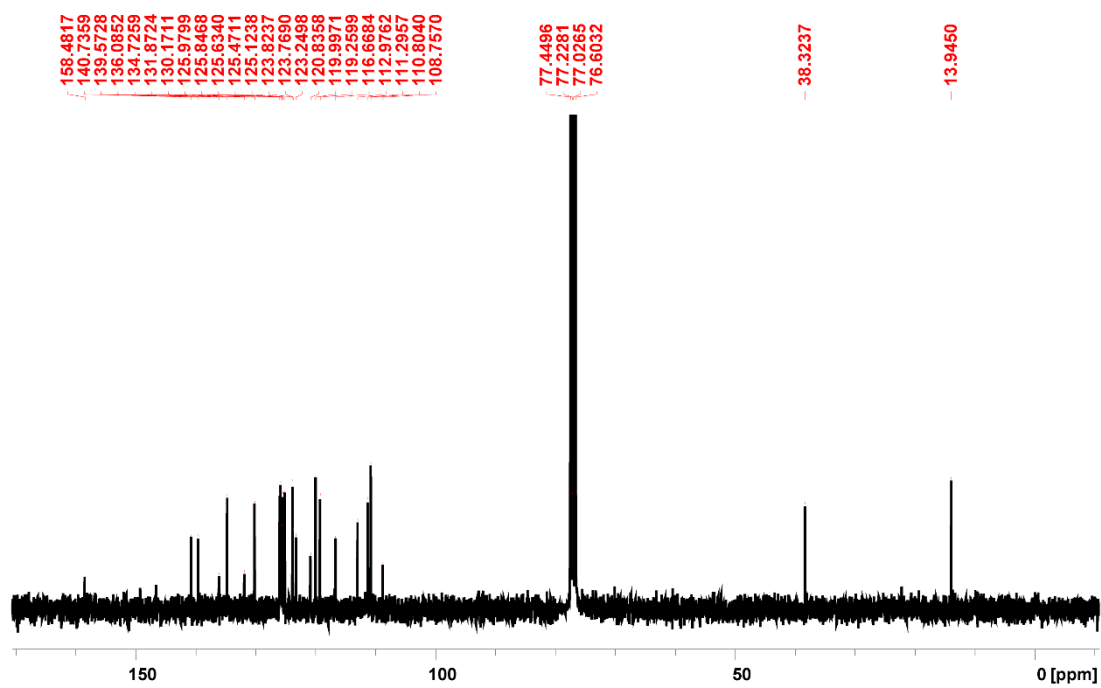

Fig. S7b.  $^{13}\text{C}$  NMR spectrum of **1** in  $\text{CDCl}_3$

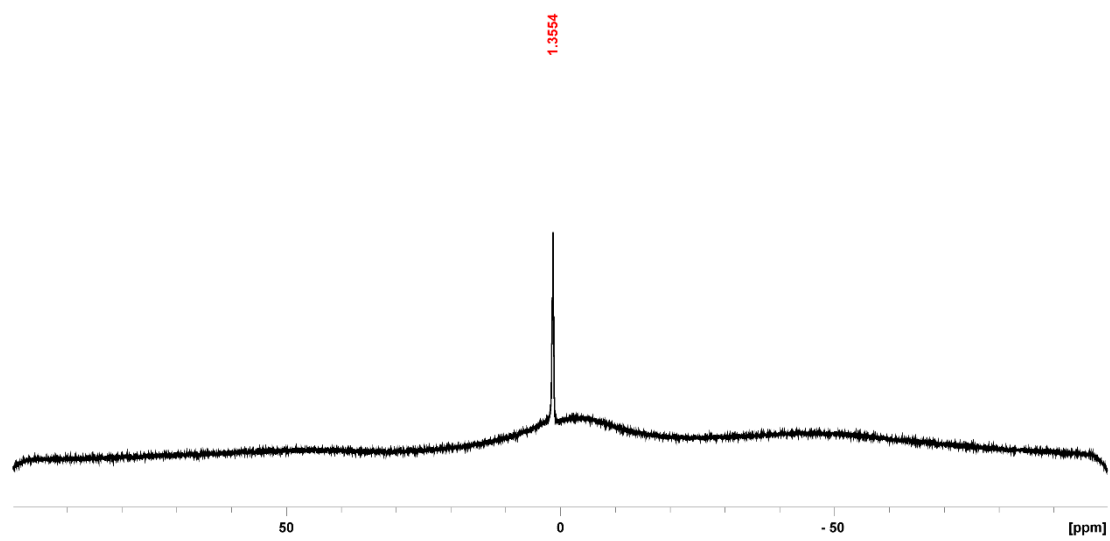

Fig. S8.  $^{11}\text{B}$  NMR spectrum of **1** in  $\text{CDCl}_3$

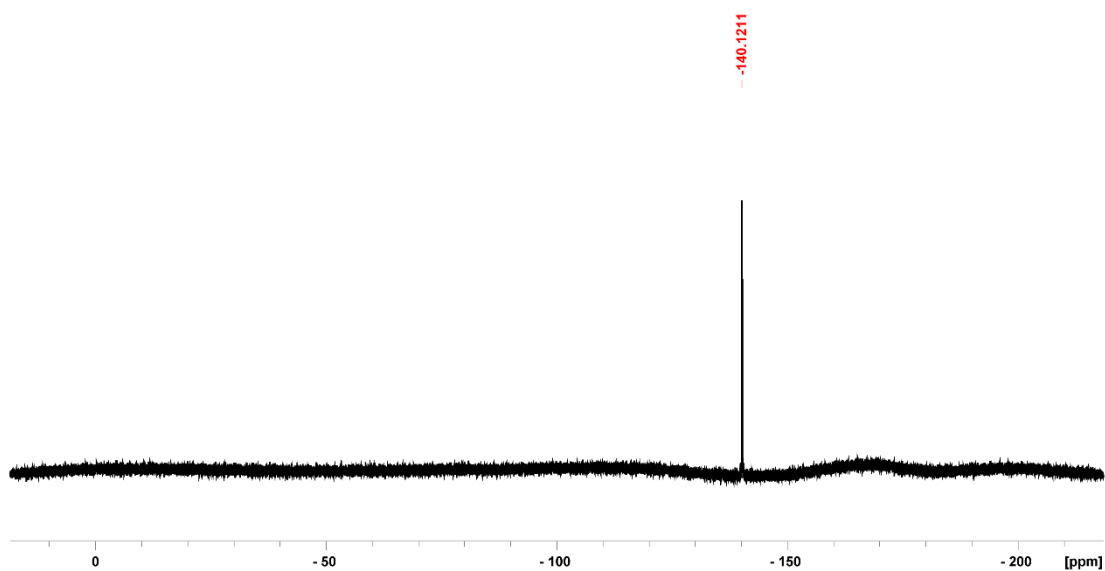

Fig. S9.  $^{19}\text{F}$  NMR spectrum of **1** in  $\text{CDCl}_3$

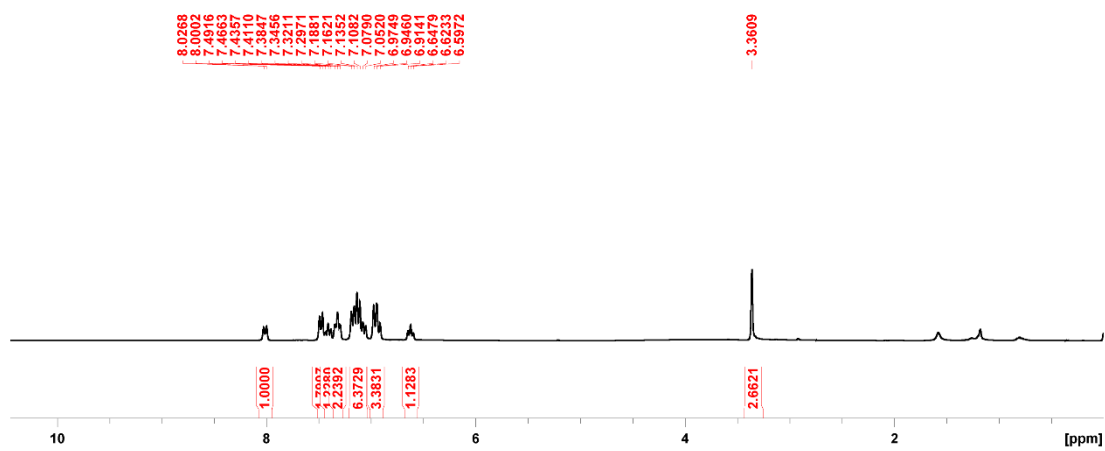

Fig. S10a.  $^1\text{H}$  NMR spectrum of **2** in  $\text{CDCl}_3$

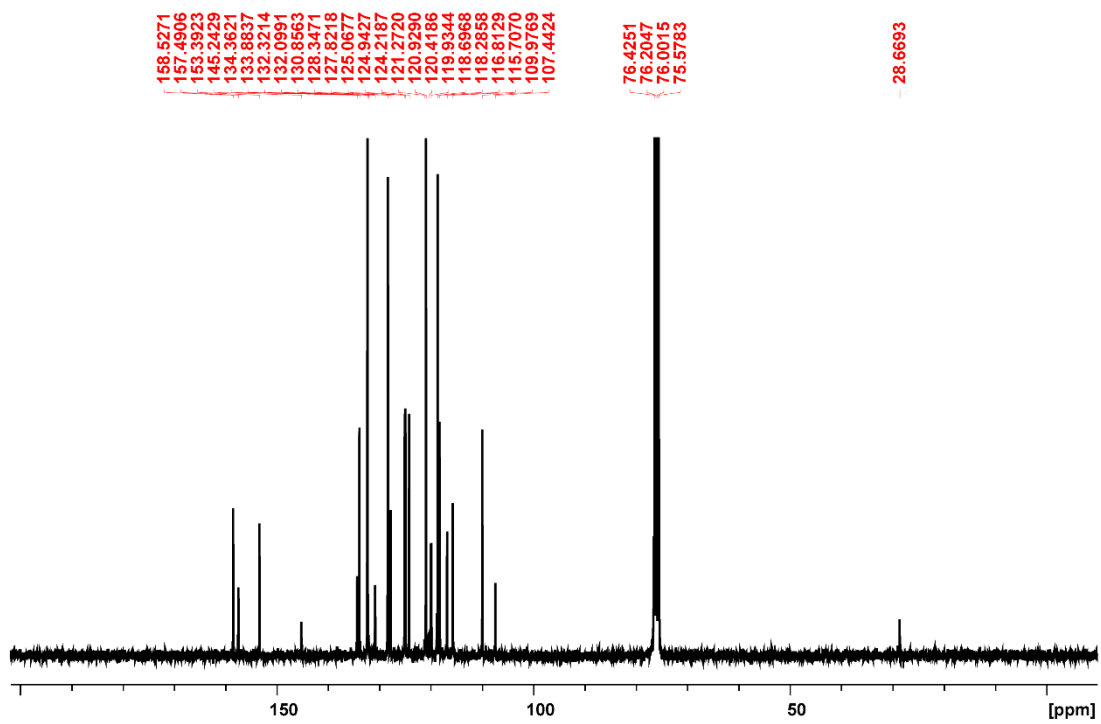

Fig. S10b.  $^{13}\text{C}$  NMR spectrum of **2** in  $\text{CDCl}_3$

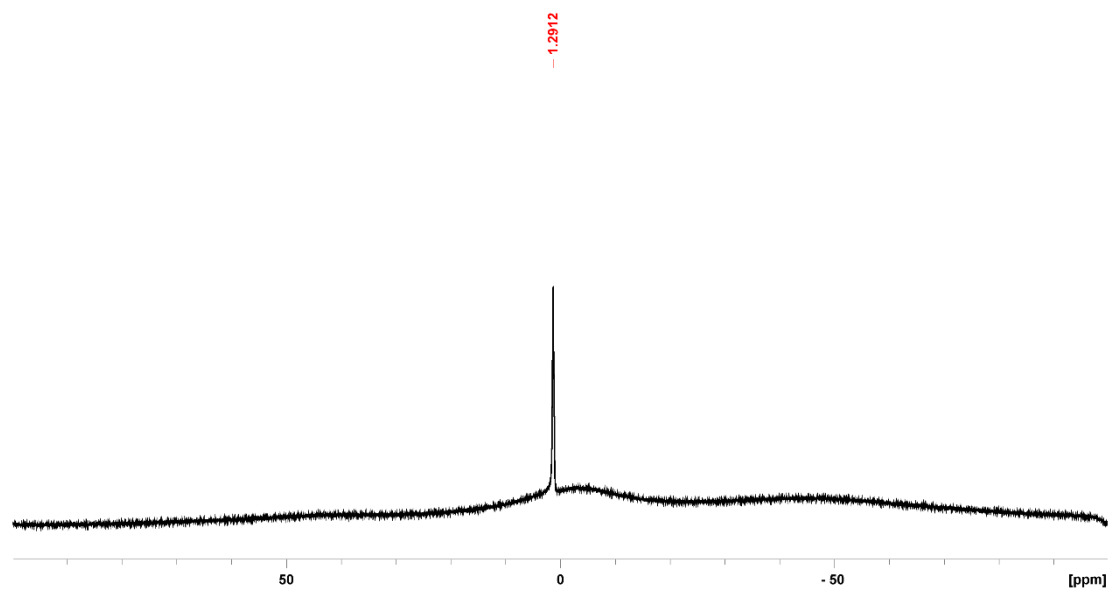

Fig. S11.  $^{11}\text{B}$  NMR spectrum of **2** in  $\text{CDCl}_3$

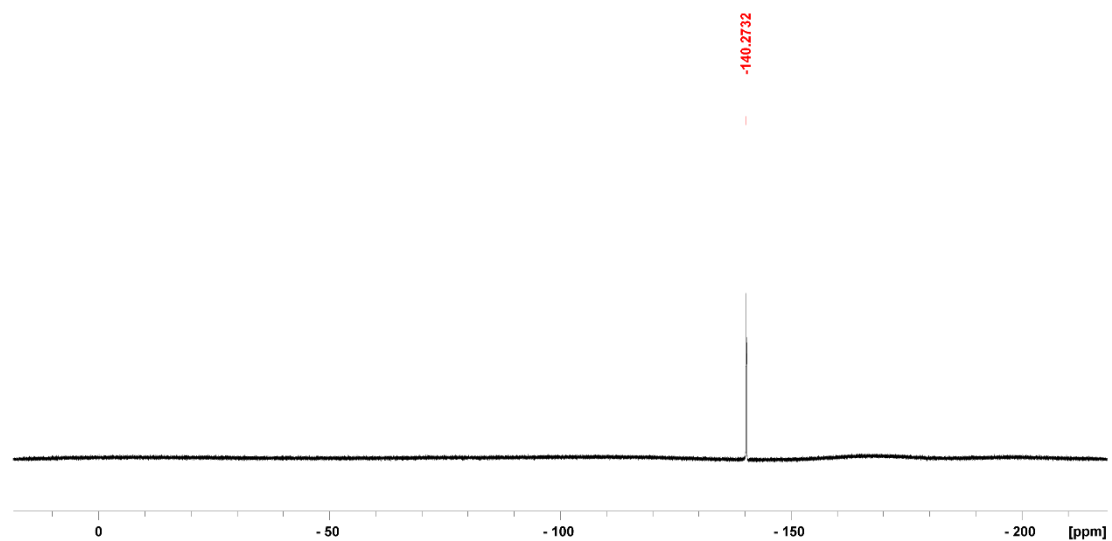

Fig. S12.  $^{19}\text{F}$  NMR spectrum of **2** in  $\text{CDCl}_3$

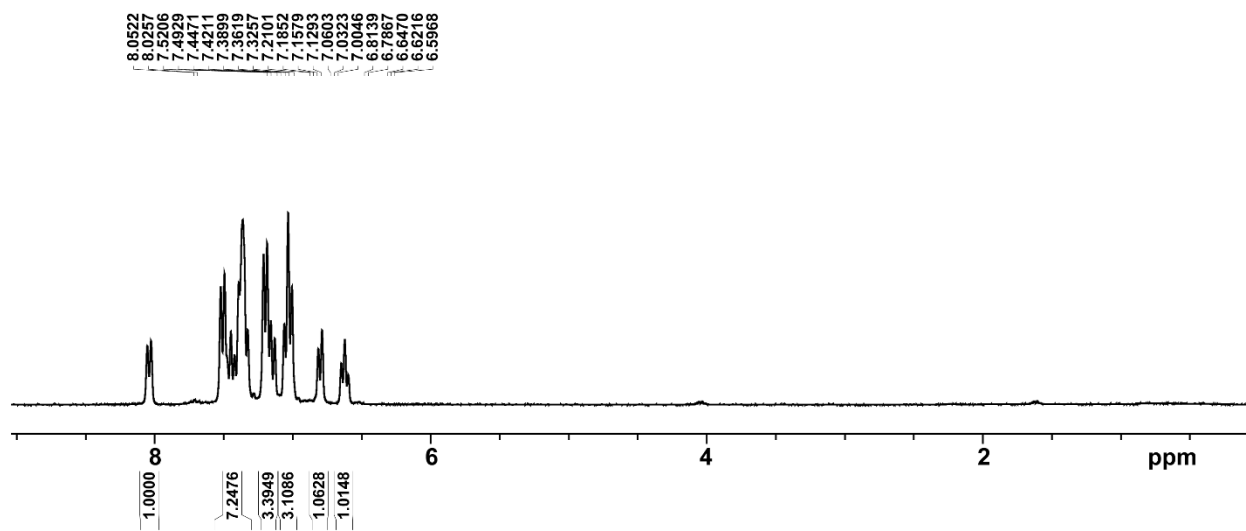

Fig. S13a.  $^1\text{H}$  NMR spectrum of **3** in  $\text{CDCl}_3$

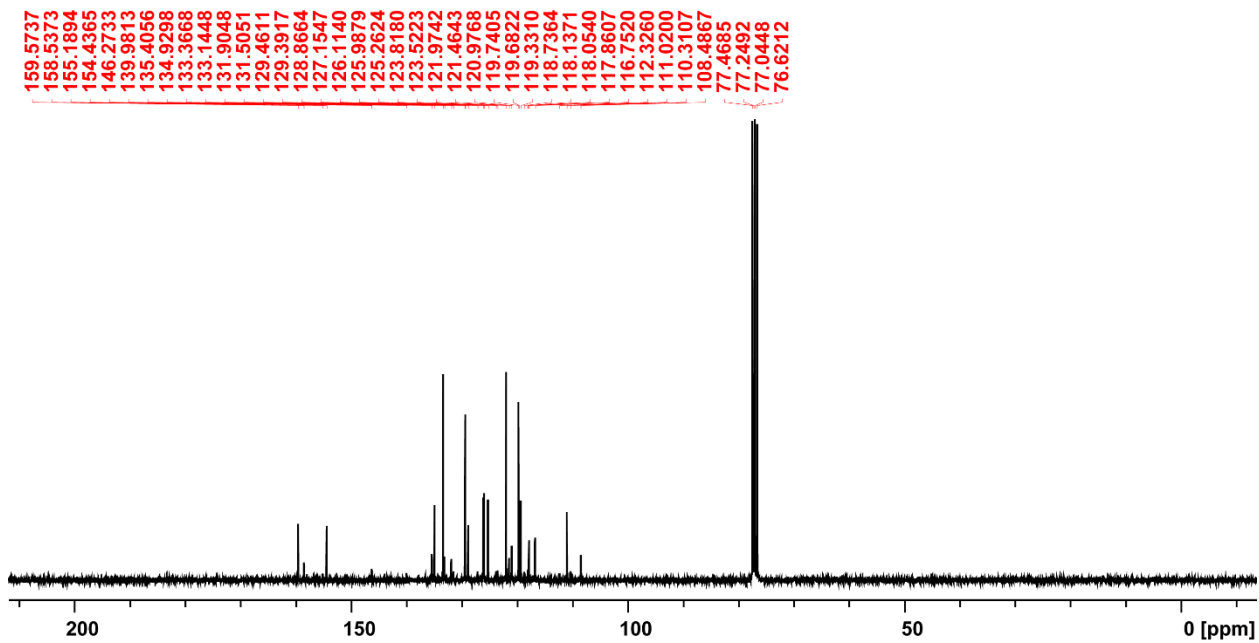

Fig. S13b.  $^{13}\text{C}$  NMR spectrum of **3** in  $\text{CDCl}_3$

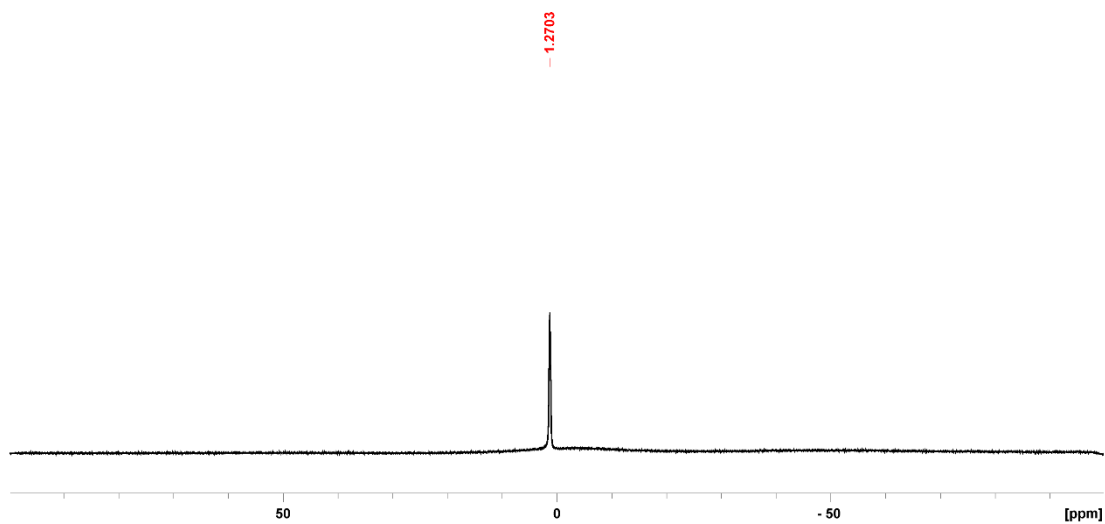

Fig. S14.  $^{11}\text{B}$  NMR spectrum of **3** in  $\text{CDCl}_3$

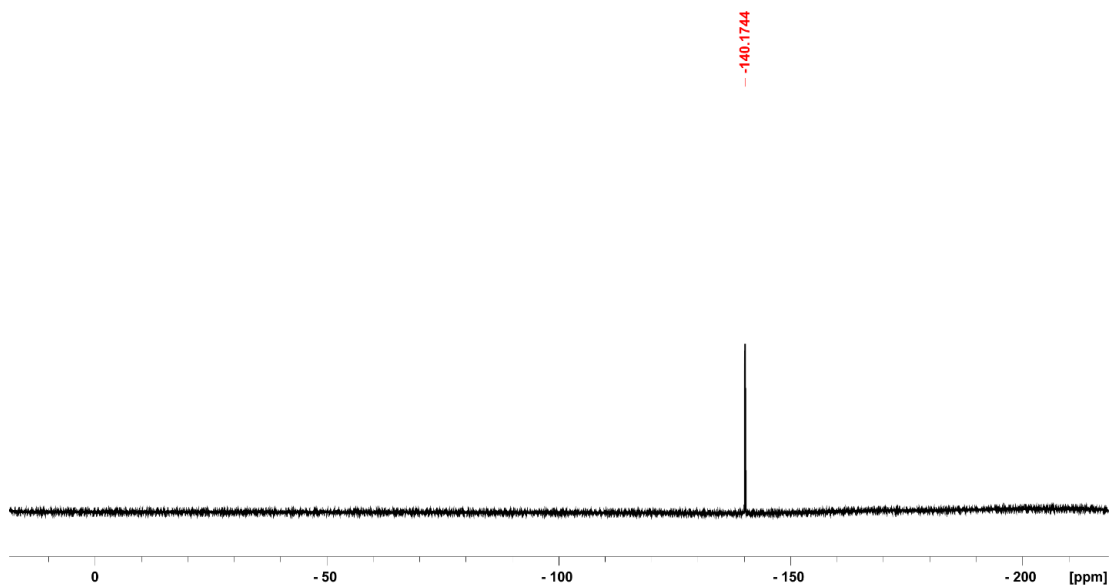

Fig. S15.  $^{19}\text{F}$  NMR spectrum of **3** in  $\text{CDCl}_3$

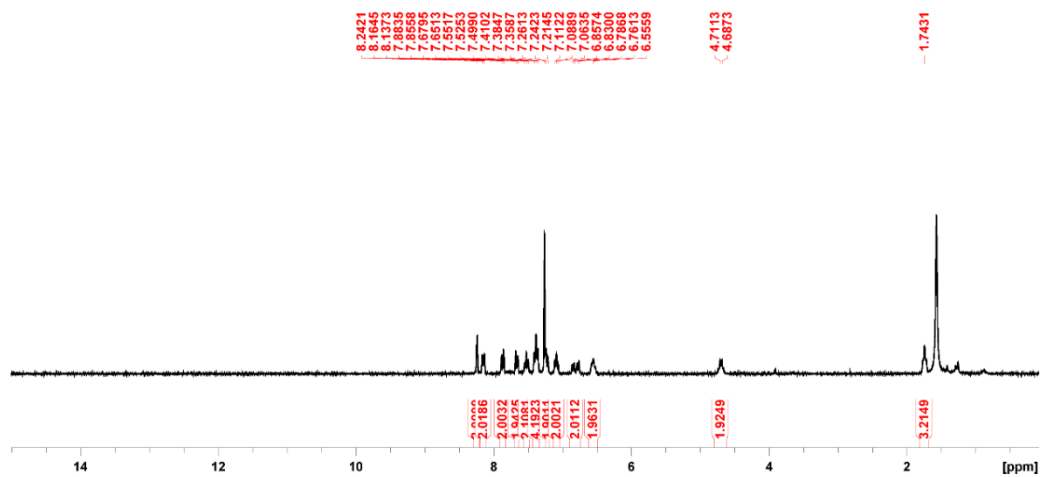

Fig. S16a.  $^1\text{H}$  NMR spectrum of **4** in  $\text{CDCl}_3$

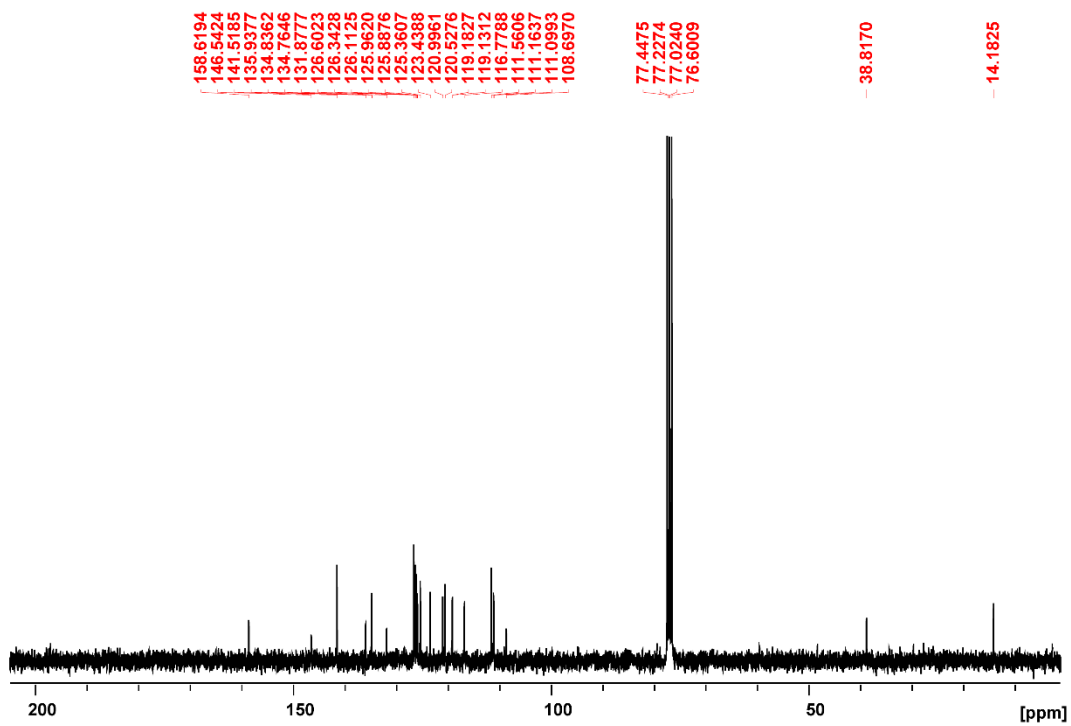

Fig. S16b.  $^{13}\text{C}$  NMR spectrum of **4** in  $\text{CDCl}_3$

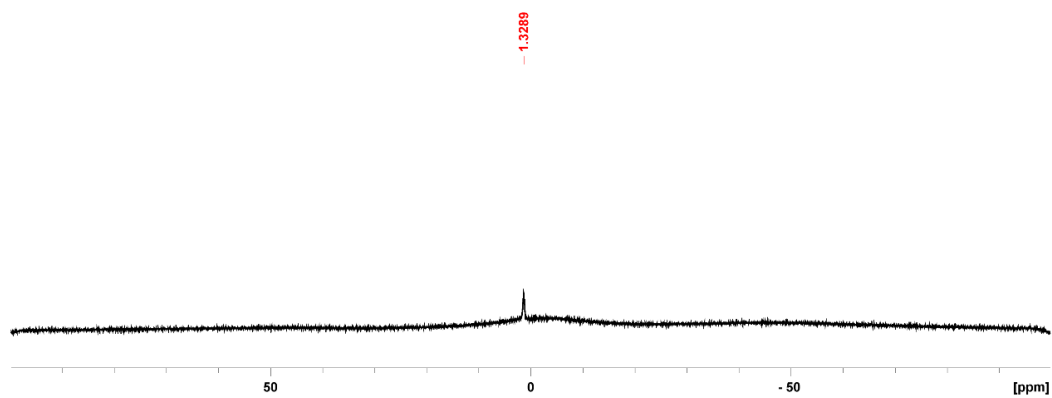

Fig. S17.  $^{11}\text{B}$  NMR spectrum of **4** in  $\text{CDCl}_3$



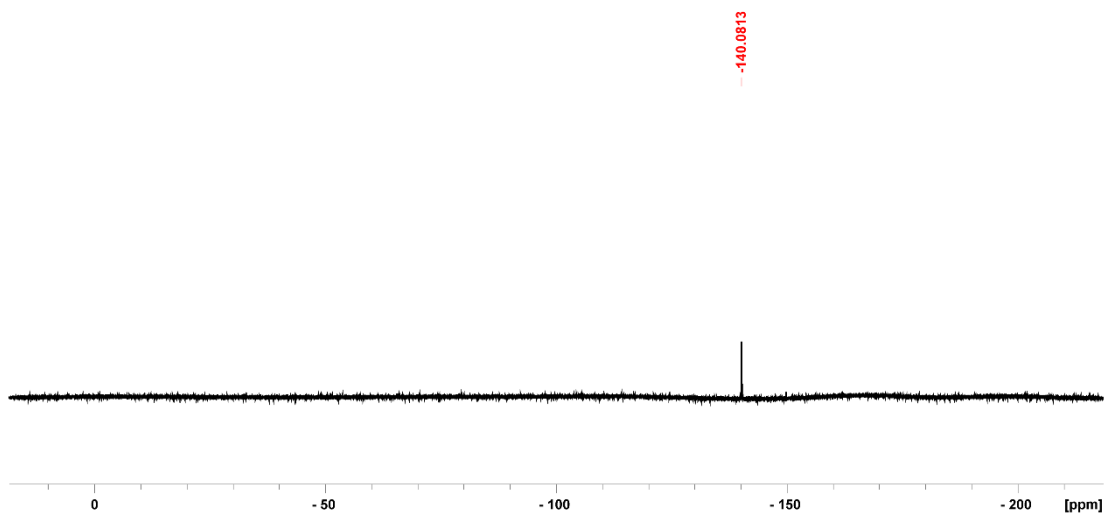

Fig. S18.  $^{19}\text{F}$  NMR spectrum of **4** in  $\text{CDCl}_3$

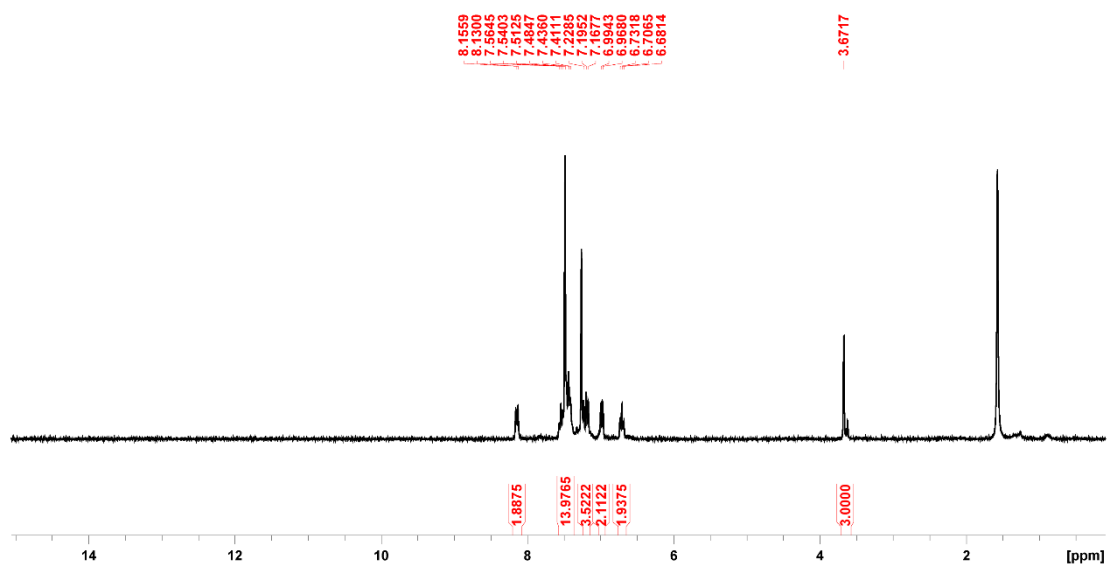

Fig. S19a.  $^1\text{H}$  NMR spectrum of **5** in  $\text{CDCl}_3$

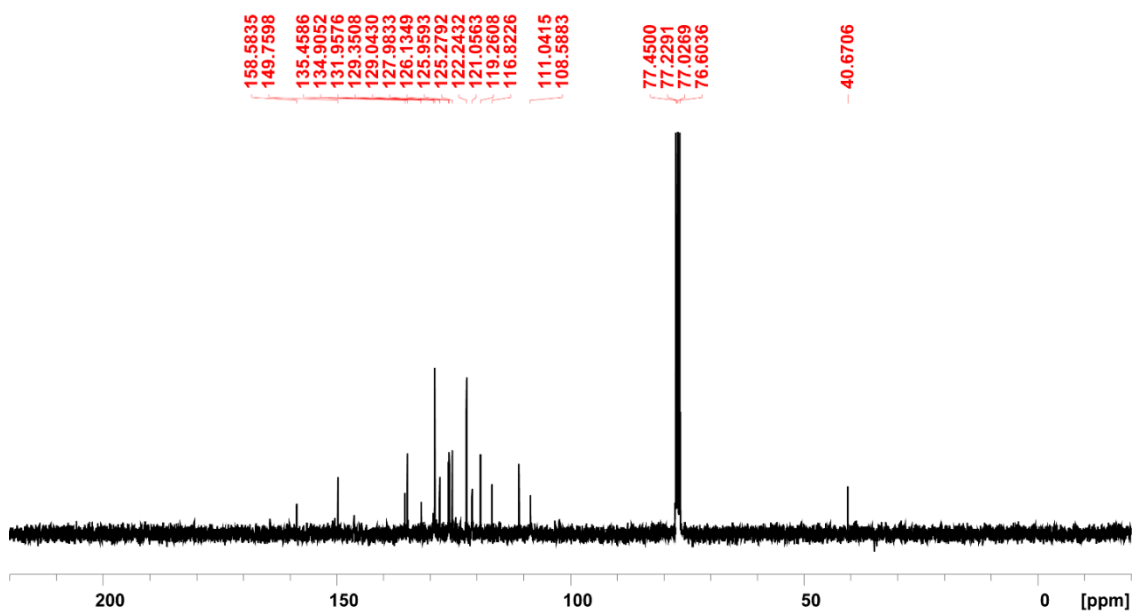

Fig. S19b.  $^{13}\text{C}$  NMR spectrum of **5** in  $\text{CDCl}_3$

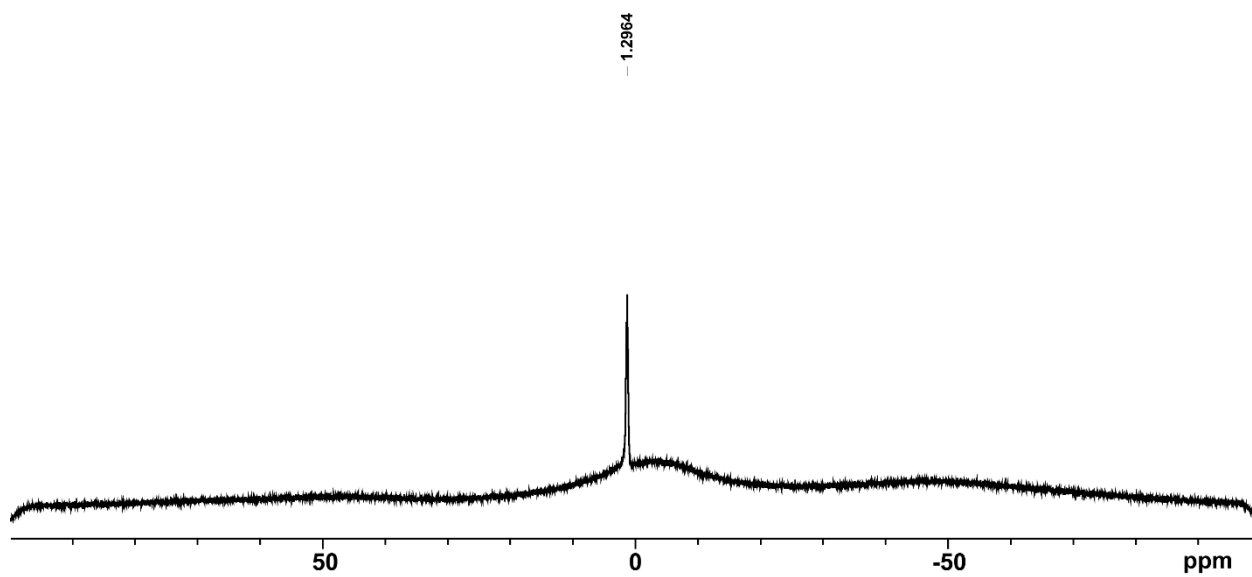

Fig. S20.  $^{11}\text{B}$  NMR spectrum of **5** in  $\text{CDCl}_3$

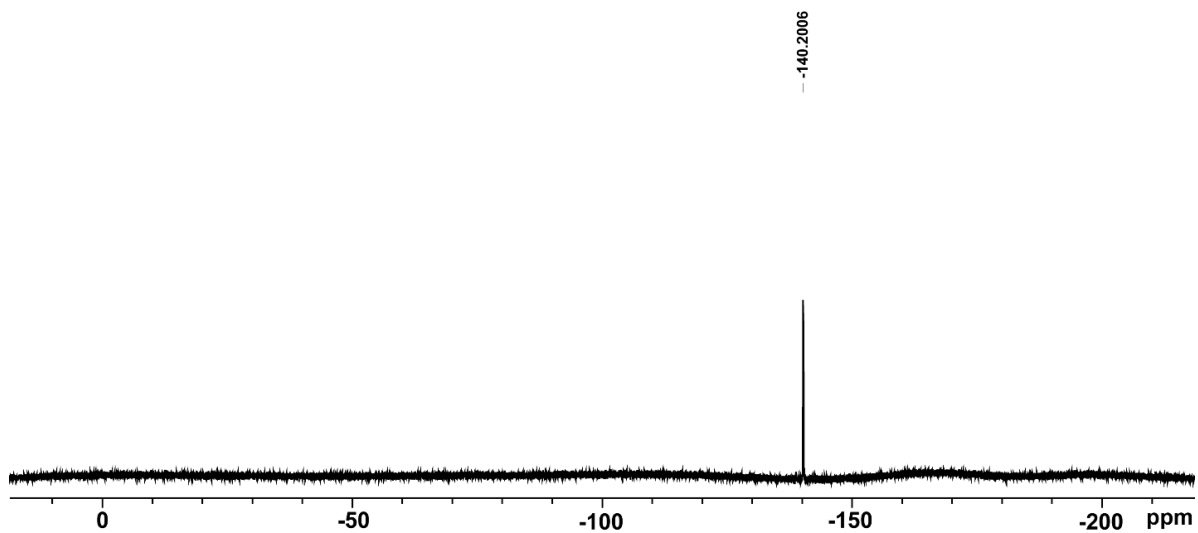

Fig. S21.  $^{19}\text{F}$  NMR spectrum of **5** in  $\text{CDCl}_3$

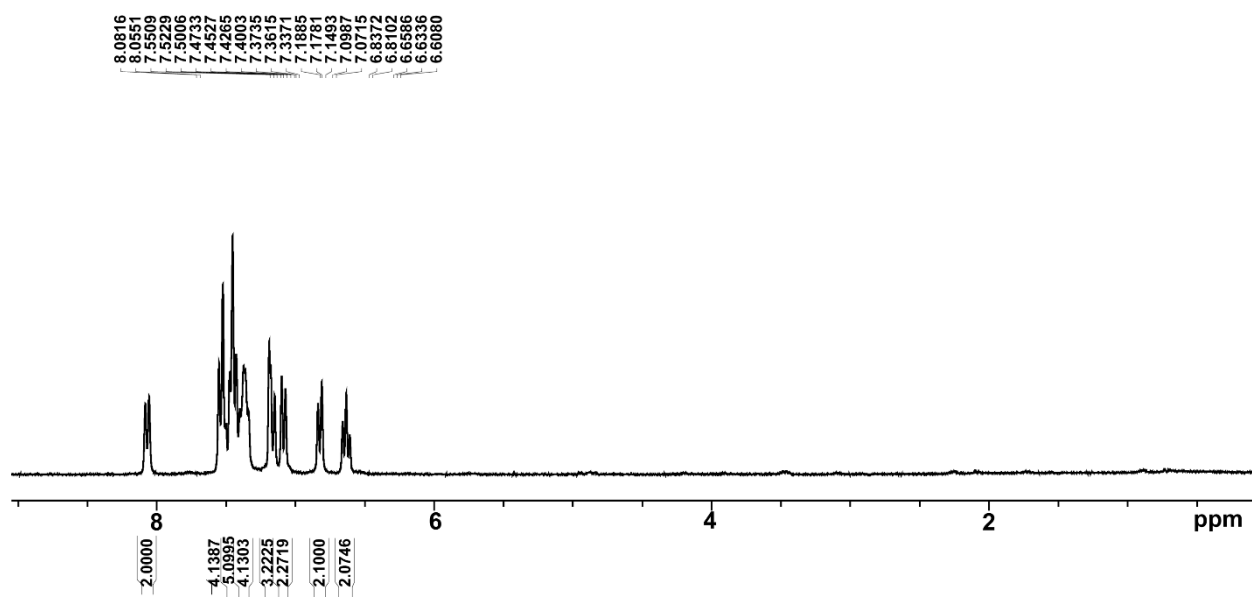

Fig. S22a.  $^1\text{H}$  NMR spectrum of **6** in  $\text{CDCl}_3$

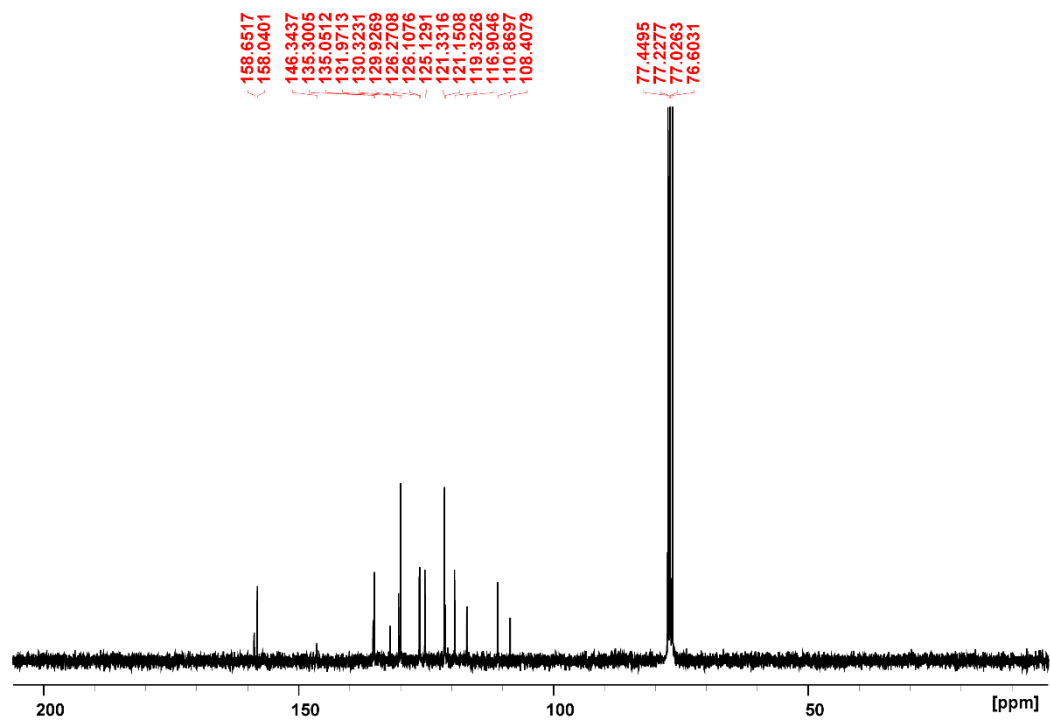

Fig. S22b.  $^{13}\text{C}$  NMR spectrum of **6** in  $\text{CDCl}_3$

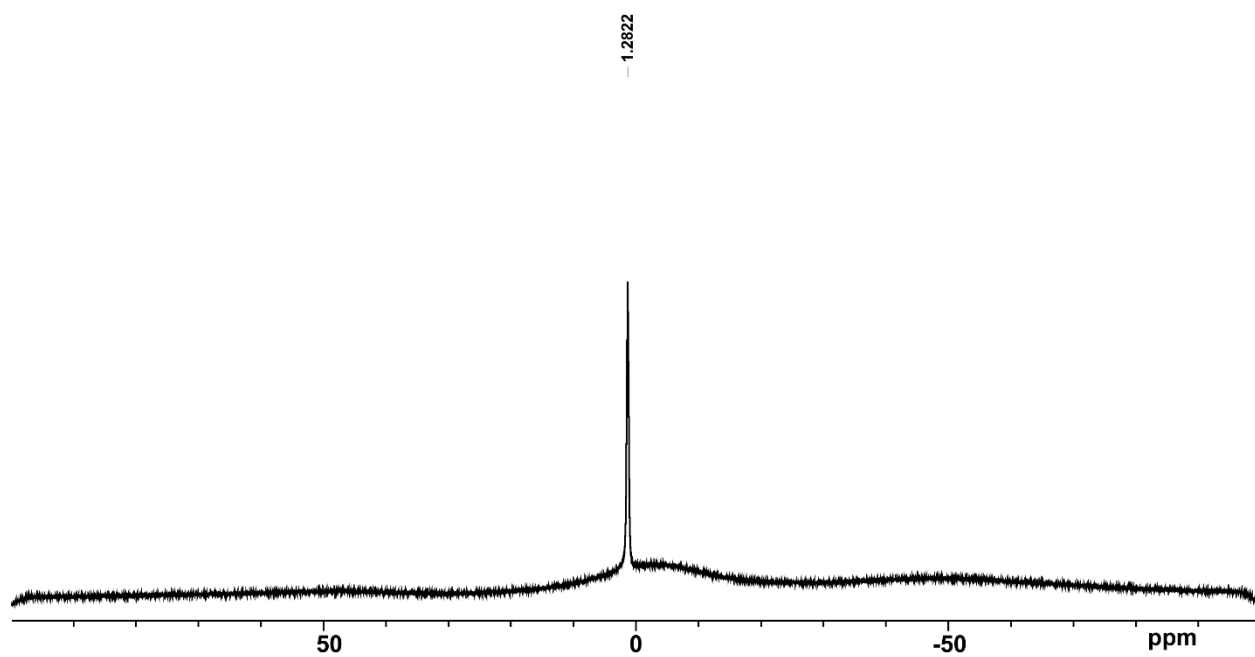

Fig. S23.  $^{11}\text{B}$  NMR spectrum of **6** in  $\text{CDCl}_3$

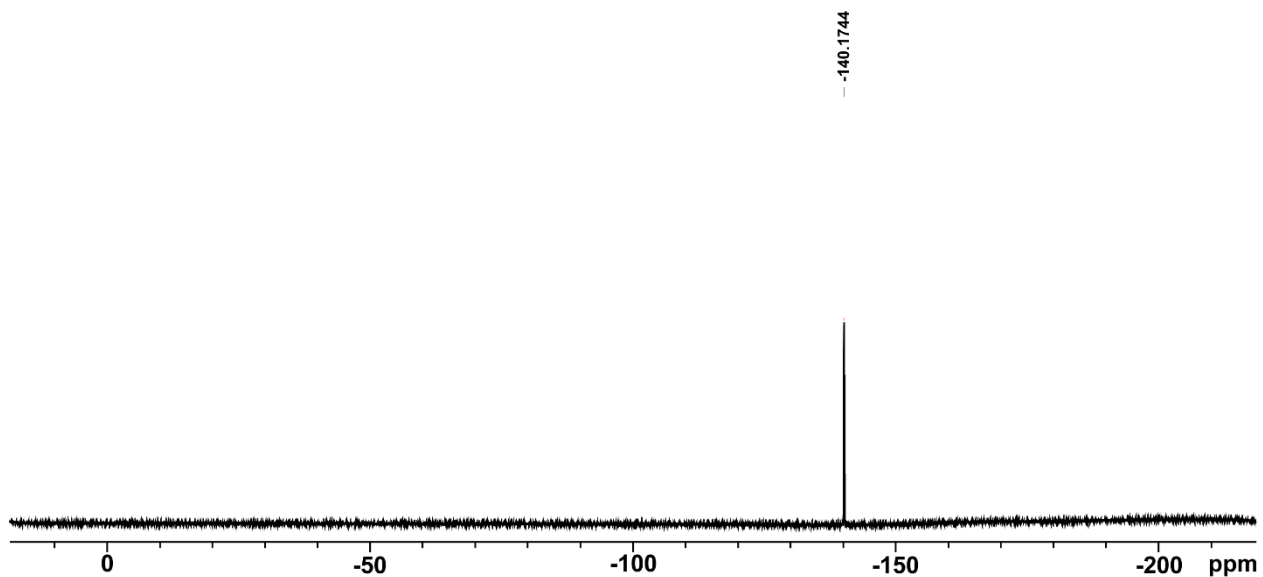

Fig. S24.  $^{19}\text{F}$  NMR spectrum of **6** in  $\text{CDCl}_3$

Table S1. Intermolecular hydrogen bonds for **L1-L6** [ $\text{\AA}$  and  $^\circ$ ].

| Compounds | D-H...A    | $d(\text{D-H})$ | $d(\text{H...A})$ | $d(\text{D...A})$ | $\angle\text{D-H...A}$ |
|-----------|------------|-----------------|-------------------|-------------------|------------------------|
| L1        | O3-H3...N1 | 0.82            | 1.89              | 2.6150            | 147                    |
| L3        | O1-H1...N1 | 0.82            | 1.91              | 2.6232            | 144                    |
| L4        | O1-H1...N1 | 0.82            | 1.90              | 2.6294            | 148                    |
| L4        | O2-H2...N4 | 0.82            | 1.86              | 2.5886            | 148                    |
| L6        | O1-H1...N1 | 0.82            | 1.83              | 2.5608            | 148                    |
| L6        | O3-H3...N3 | 0.82            | 1.81              | 2.5466            | 149                    |

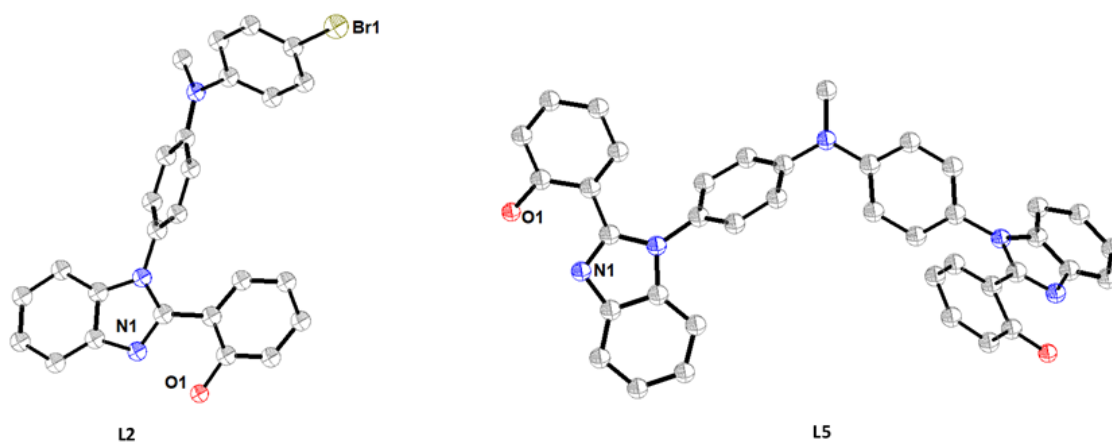

**Fig.S25.** ORTEP representation of the crystal structure of **L2** and **L5** with 50% probability ellipsoids. Hydrogen atoms are omitted for clarity. Color code: carbon (gray), oxygen (red), nitrogen (blue), and bromide (dark yellow).

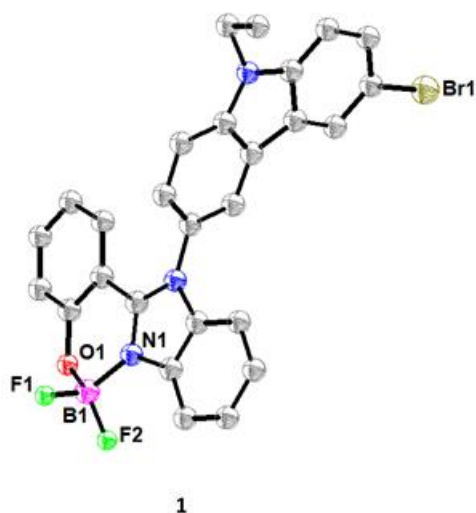

**Fig. S26.** ORTEP representation of the crystal structure of **1** with 50% probability ellipsoids. Hydrogen atoms are omitted for clarity. Color code: carbon (gray), oxygen (red), nitrogen (blue), bromide (dark yellow), boron (pink), and fluoride (bright green).

## Electronic Supporting information

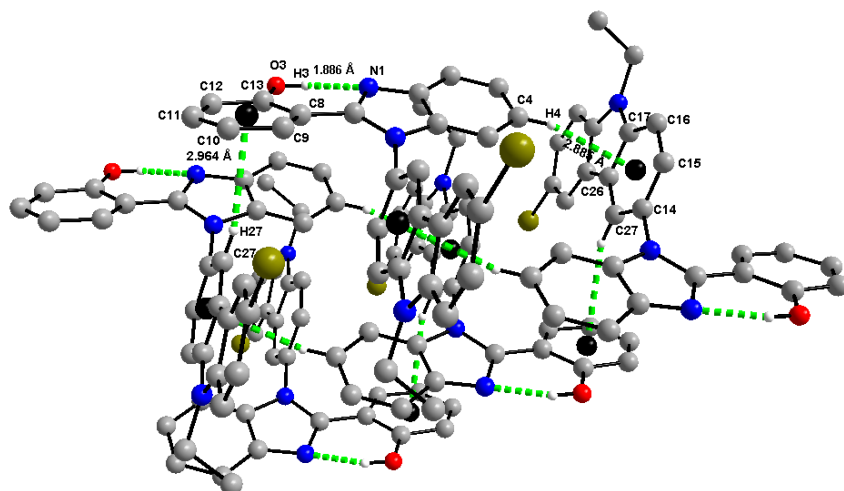

**Fig.S27.** Hydrogen-bonding and C-H... $\pi$  (green line) interactions for **L1**. Atom color code: carbon (gray), hydrogen (white), nitrogen (blue), oxygen (red), bromide (dark yellow). Hydrogen atoms are omitted for clarity.

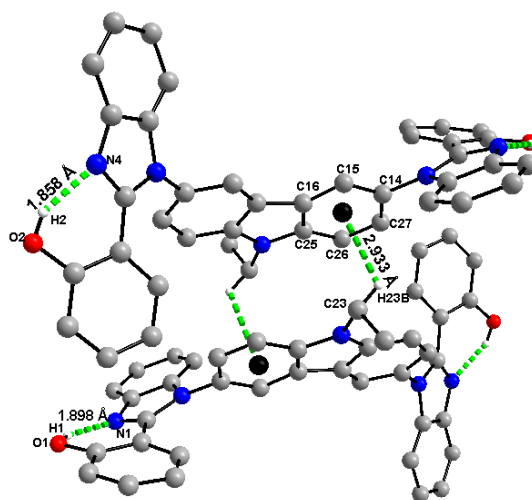

**Fig.S28.** Hydrogen-bonding and C-H... $\pi$  (green line) interactions for **L4**. Atom color code: carbon (gray), hydrogen (white), nitrogen (blue), oxygen (red). Hydrogen atoms are omitted for clarity.

Electronic Supporting information

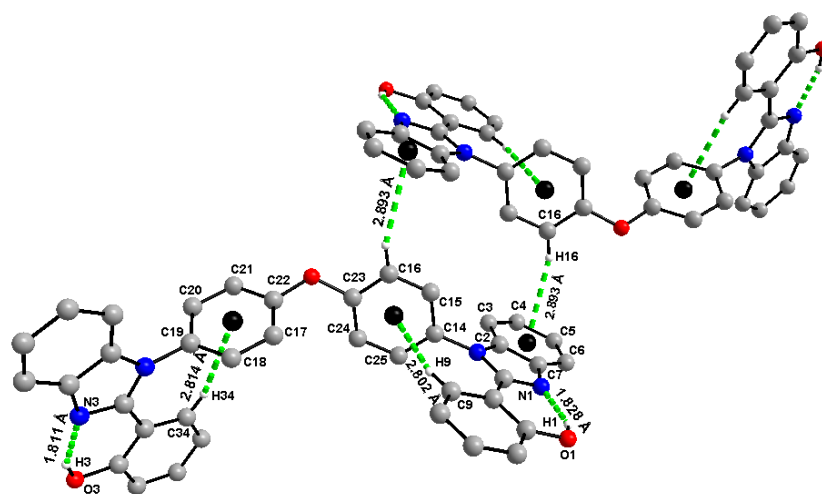

**Fig.S29.** Hydrogen-bonding and C-H $\cdots\pi$  (green line) interaction for **L6**. Atom color code: carbon (gray), hydrogen (white), nitrogen (blue), oxygen (red). Hydrogen atoms are omitted for clarity

**Table S2.** Intermolecular hydrogen bonds for **1**, **3**, **4** and **6** [ $\text{\AA}$  and  $^\circ$ ].

| Compounds | D-H $\cdots$ A       | $d(\text{D-H})$ | $d(\text{H}\cdots\text{A})$ | $d(\text{D}\cdots\text{A})$ | $\angle\text{D-H}\cdots\text{A}$ |
|-----------|----------------------|-----------------|-----------------------------|-----------------------------|----------------------------------|
| <b>3</b>  | C18-H18 $\cdots$ Br  | 0.95            | 2.79                        | 3.7269                      | 169                              |
|           | C19-H19 $\cdots$ O1  | 0.95            | 2.57                        | 3.4456                      | 154                              |
|           | C22-H22 $\cdots$ F1  | 0.95            | 2.49                        | 3.3777                      | 156                              |
| <b>4</b>  | C15-H15 $\cdots$ O1  | 0.93            | 2.60                        | 3.3681                      | 141                              |
|           | C24-H24C $\cdots$ F1 | 0.96            | 2.44                        | 3.3918                      | 173                              |
|           | C32-H32 $\cdots$ F1  | 0.93            | 2.50                        | 3.2934                      | 143                              |
| <b>6</b>  | C19-H19 $\cdots$ F2  | 0.93            | 2.50                        | 3.3346                      | 149                              |



## Electronic Supporting information

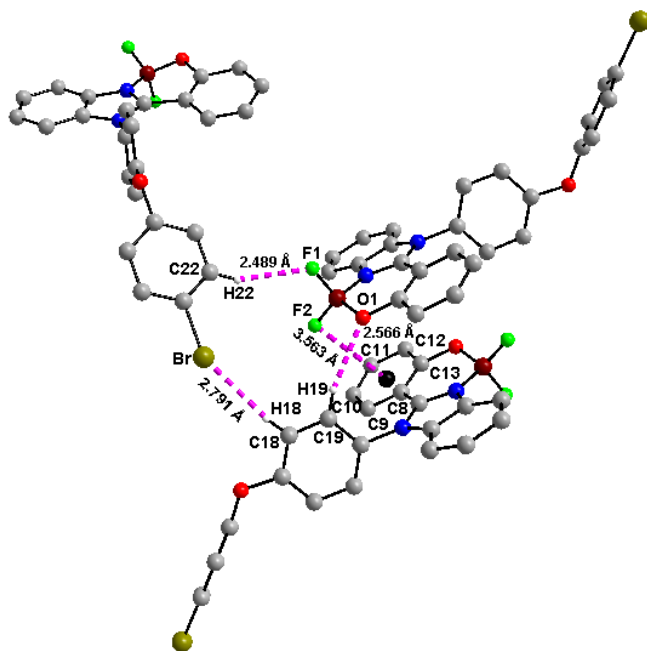

**Fig.S30.** Hydrogen-bonding and C-H... $\pi$  (pink line) interactions for **3**. Atom color code: carbon (gray), hydrogen (white), boron (dark red), nitrogen (blue), oxygen (red), fluoride (bright green), bromide (dark yellow). Hydrogen atoms are omitted for clarity.

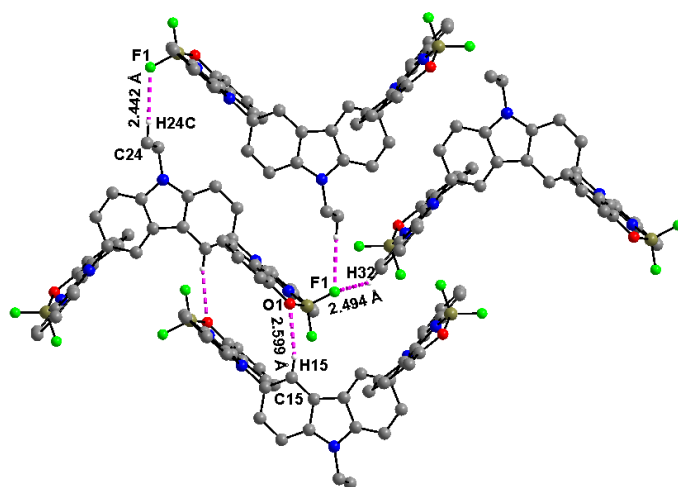

**Fig.S31.** Hydrogen-bonding (pink line) interactions for **4**. Atom color code: carbon (gray), hydrogen (white), boron (dark red), nitrogen (blue), oxygen (red), fluoride (bright green). Hydrogen atoms are omitted for clarity.

Electronic Supporting information

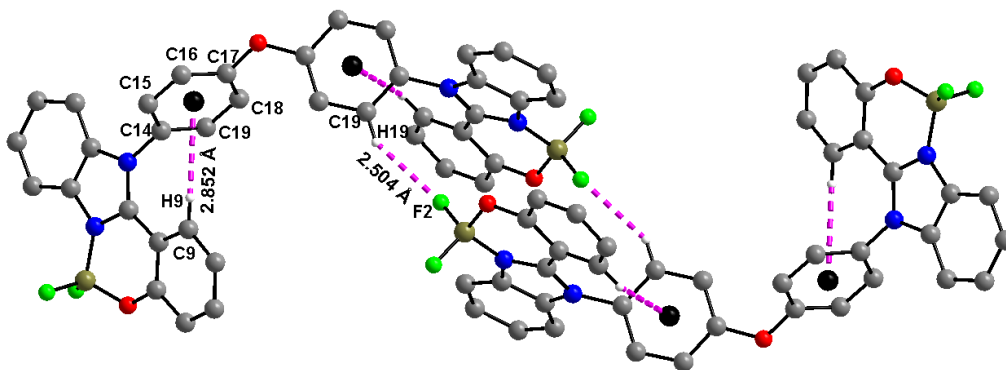

**Fig.S32.** Hydrogen-bonding and C-H... $\pi$  (pink line) interactions for **6**. Atom color code: carbon (gray), hydrogen (white), boron (dark red), nitrogen (blue), oxygen (red), fluoride (bright green). Hydrogen atoms are omitted for clarity.

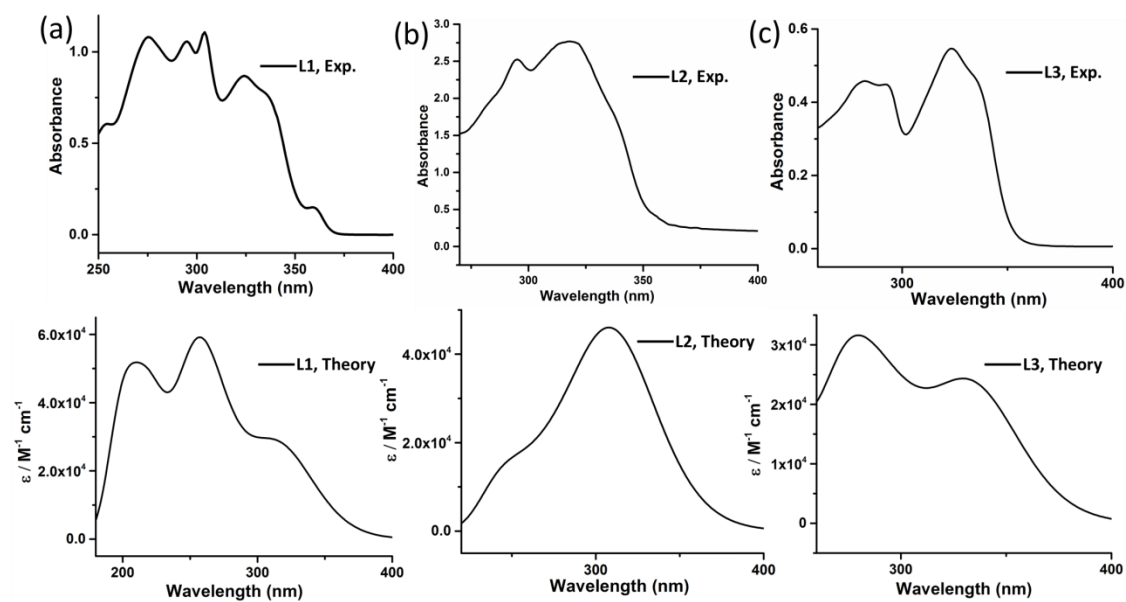

**Fig. S33.** Experimental and theoretical UV-Vis spectra for ligands, **L1** (a), **L2** (b) and **L3** (c).

## Electronic Supporting information

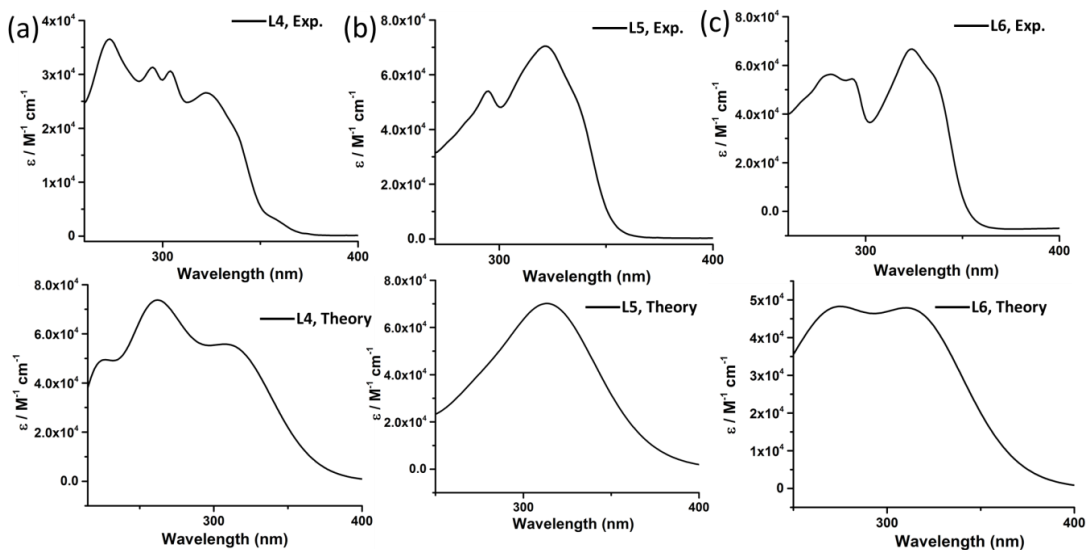

**Fig. S34.** Experimental and theoretical UV-Vis spectra for ligands, L4 (a), L5 (b) and L6 (c).

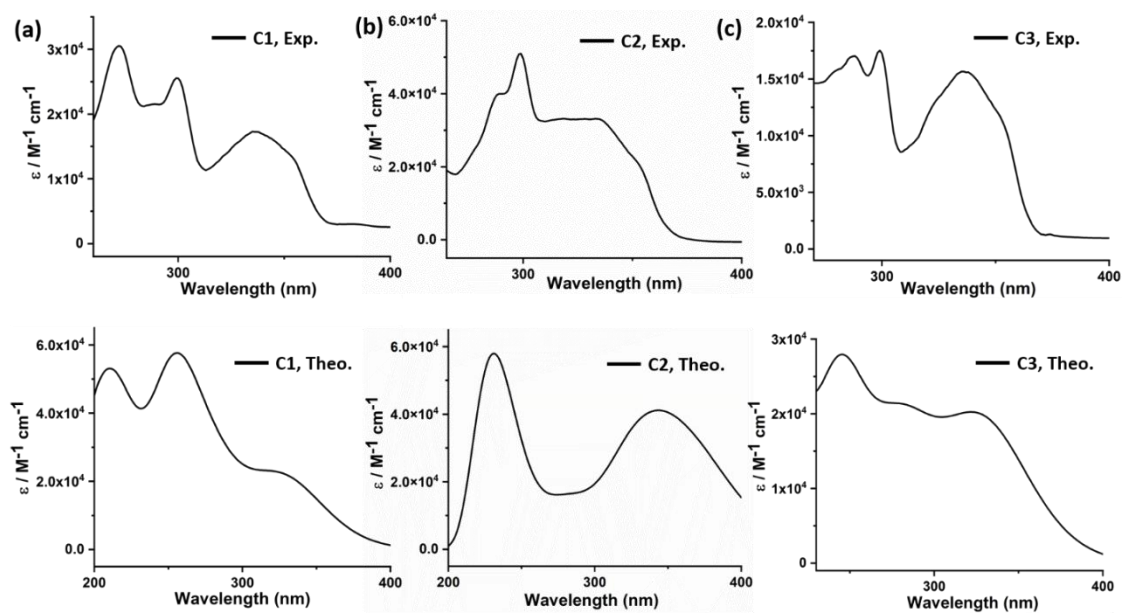

**Fig. S35.** Experimental and theoretical UV-Vis spectra for complexes, 1 (a), 2 (b) and 3 (c)

## Electronic Supporting information

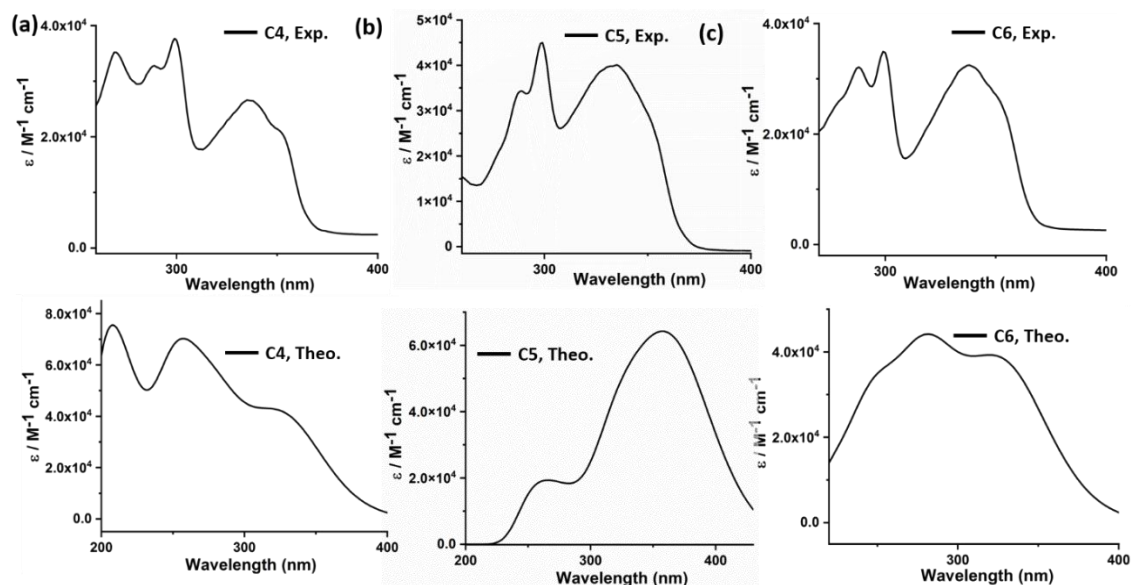

Fig. S36. Experimental and theoretical UV-Vis spectra for complexes, **4** (a), **5** (b) and **6** (c).

Table S3: Summary of photophysical data of ligands and boron complexes in CHCl<sub>3</sub> and THF

| Compound  | Solvent           | $\lambda_{\text{abs}}$ (nm) | $\epsilon$ (mol <sup>-1</sup> L cm <sup>-1</sup> ) | $\lambda_{\text{ems}}^a$ (nm) | Stokes shift (cm <sup>-1</sup> ) |
|-----------|-------------------|-----------------------------|----------------------------------------------------|-------------------------------|----------------------------------|
| <b>L1</b> | CHCl <sub>3</sub> | 328                         | 17000                                              | 484                           | 9826                             |
|           | THF               | 325                         | 29800                                              | 495                           | 10567                            |
| <b>L2</b> | CHCl <sub>3</sub> | 318                         | 29000                                              | 486                           | 10870                            |
|           | THF               | 325                         | 26800                                              | 495                           | 10567                            |
| <b>L3</b> | CHCl <sub>3</sub> | 326                         | 14800                                              | 488                           | 10183                            |
|           | THF               | 320                         | 17800                                              | 500                           | 11250                            |
| <b>L4</b> | CHCl <sub>3</sub> | 322                         | 31000                                              | 485                           | 9962                             |
|           | THF               | 325                         | 41200                                              | 465                           | 9263                             |
| <b>L5</b> | CHCl <sub>3</sub> | 333                         | 46000                                              | 467                           | 8616                             |
|           | THF               | 320                         | 44100                                              | 469                           | 9928                             |
| <b>L6</b> | CHCl <sub>3</sub> | 324                         | 32500                                              | 474                           | 9767                             |
|           | THF               | 325                         | 35000                                              | 490                           | 10361                            |
| <b>1</b>  | CHCl <sub>3</sub> | 340                         | 18800                                              | 424                           | 5826                             |
|           | THF               | 339                         | 22900                                              | 454                           | 7472                             |
| <b>2</b>  | CHCl <sub>3</sub> | 334                         | 19900                                              | 474                           | 8843                             |
|           | THF               | 335                         | 15500                                              | 505                           | 10048                            |
| <b>3</b>  | CHCl <sub>3</sub> | 339                         | 13300                                              | 387                           | 3658                             |
|           | THF               | 337                         | 18000                                              | 388                           | 3900                             |
| <b>4</b>  | CHCl <sub>3</sub> | 340                         | 29900                                              | 387                           | 3571                             |
|           | THF               | 336                         | 27100                                              | 390                           | 4120                             |
| <b>5</b>  | CHCl <sub>3</sub> | 335                         | 36500                                              | 449                           | 7579                             |
|           | THF               | 333                         | 41700                                              | 485                           | 9411                             |
| <b>6</b>  | CHCl <sub>3</sub> | 340                         | 27800                                              | 389                           | 3704                             |
|           | THF               | 339                         | 45000                                              | 390                           | 3857                             |

<sup>a</sup> Excited at  $\lambda_{\text{max}}$ , Concentration =  $1 \times 10^{-5}$  M

## Electronic Supporting information

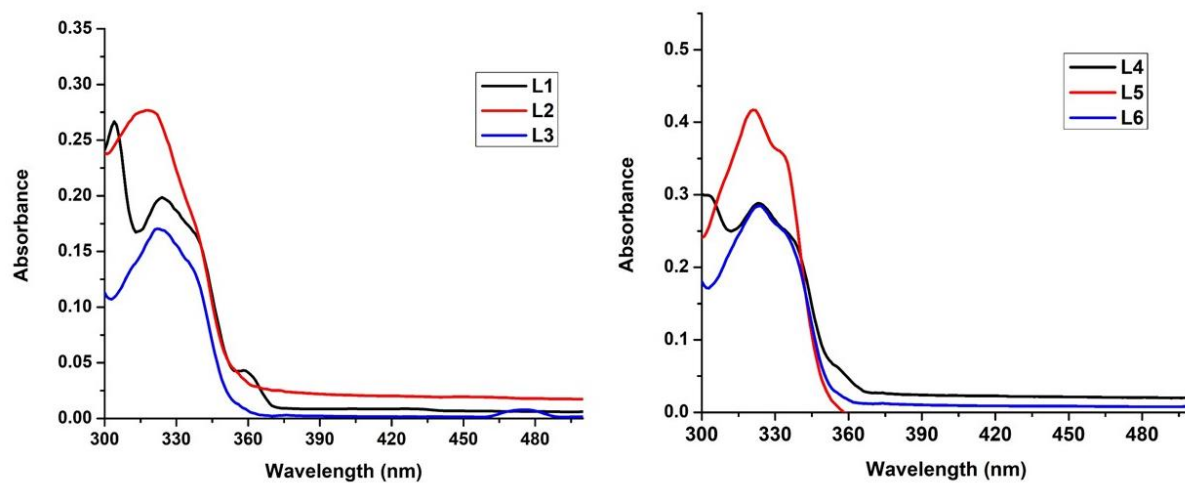

**Fig. S37.** Absorbance spectra of compounds L1-L3 (left) and L4-L6 (right) in DCM at  $1 \times 10^{-5}$  M concentration

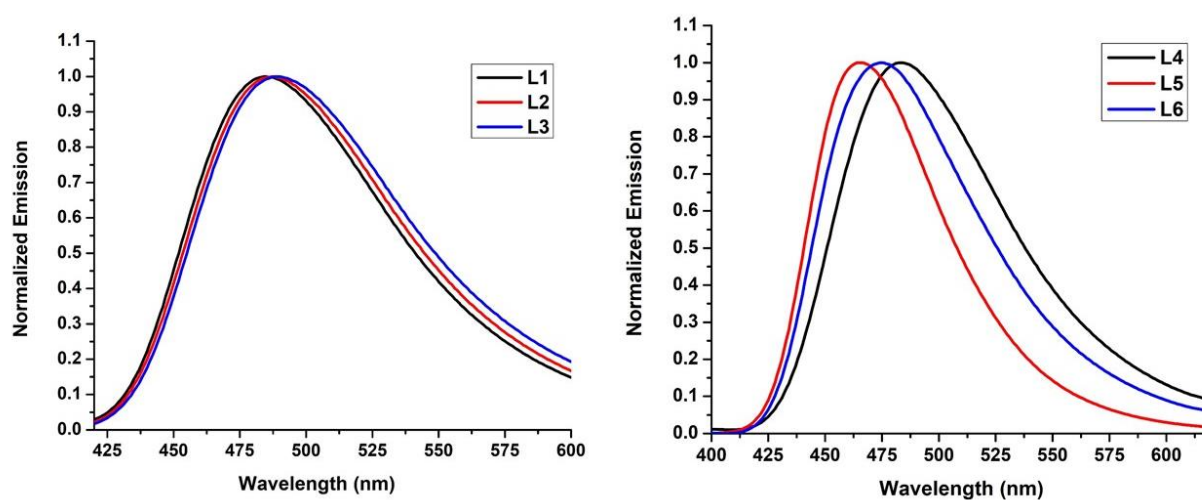

**Fig. S38.** Normalized emission spectra of compounds L1-L3 (left) and L4-L6 (right) in DCM at  $1 \times 10^{-5}$  M concentration

# Electronic Supporting information

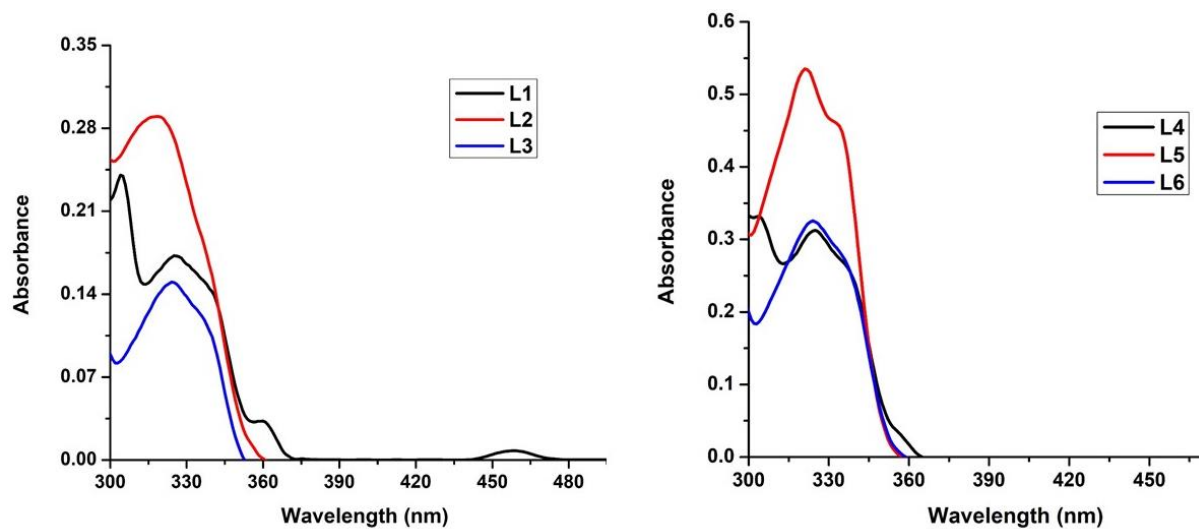

Fig S39: Absorbance spectra of compounds L1-L3 (left) and L4-L6 (right) in  $\text{CHCl}_3$  at  $1 \times 10^{-5}$  M concentration

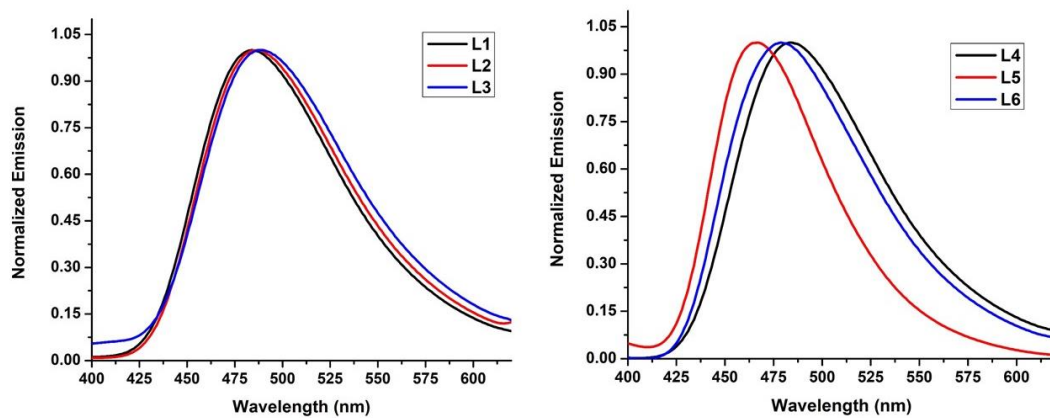

Fig. S40. Normalized emission spectra of compounds L1-L3 (left) and L4-L6 (right) in  $\text{CHCl}_3$  at  $1 \times 10^{-5}$  M concentration

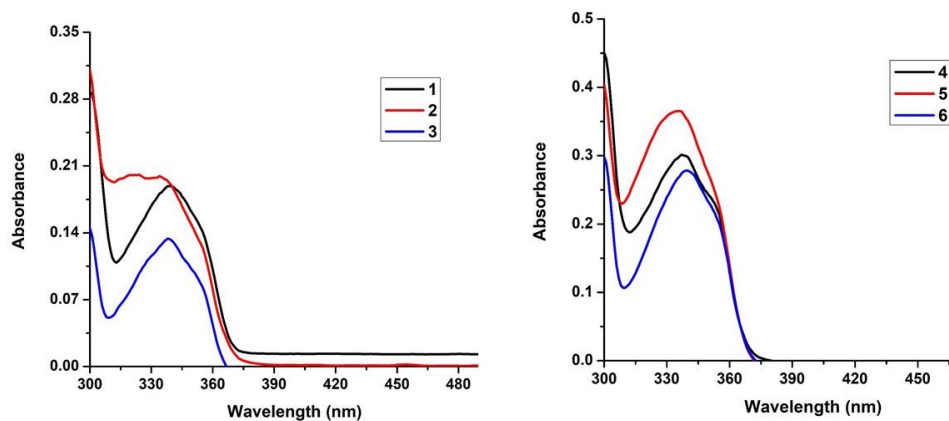

Fig. S41: Absorbance spectra of compounds 1-3 (left) and 4-6 (right) in  $\text{CHCl}_3$  at  $1 \times 10^{-5}$  M concentration

## Electronic Supporting information

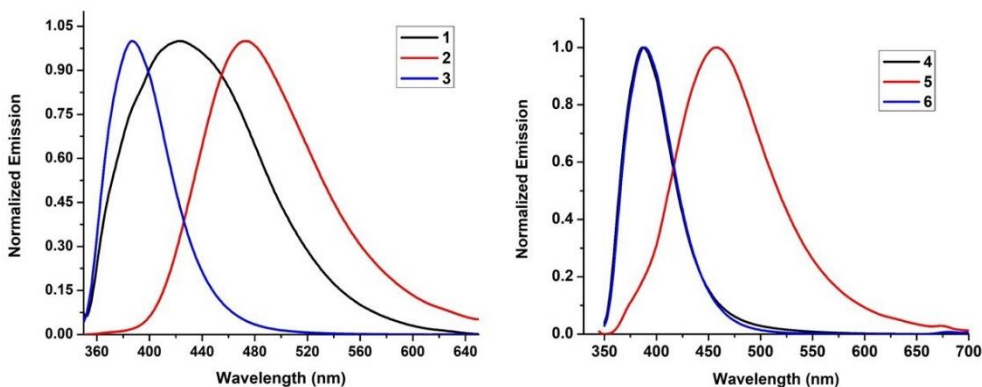

Fig. S42. Normalized emission spectra of compounds 1-3 (left) and 4-6 (right) in  $\text{CHCl}_3$  at  $1 \times 10^{-5}$  M concentration

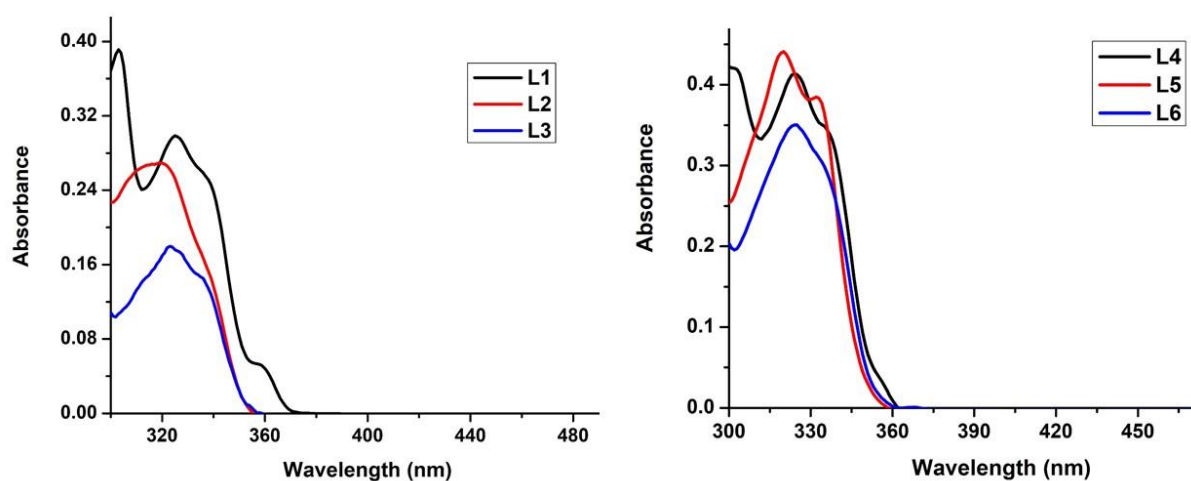

Fig S43: Absorbance spectra of compounds L1-L3 (left) and L4-L6 (right) in THF at  $1 \times 10^{-5}$  M concentration

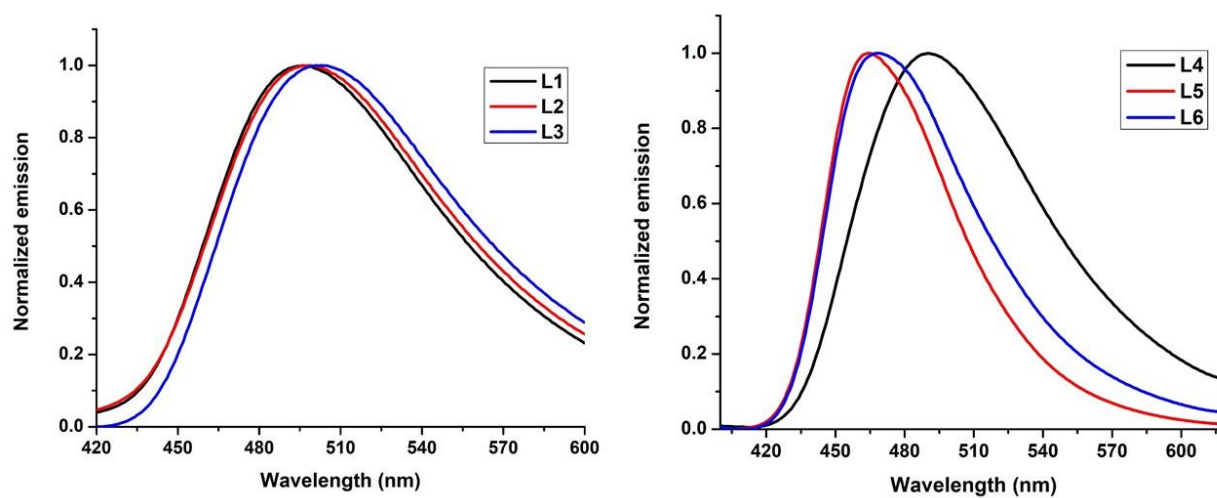

Fig. S44. Normalized Emission spectra of compounds L1-L3 (left) and L4-L6 (right) in THF at  $1 \times 10^{-5}$  M concentration

## Electronic Supporting information

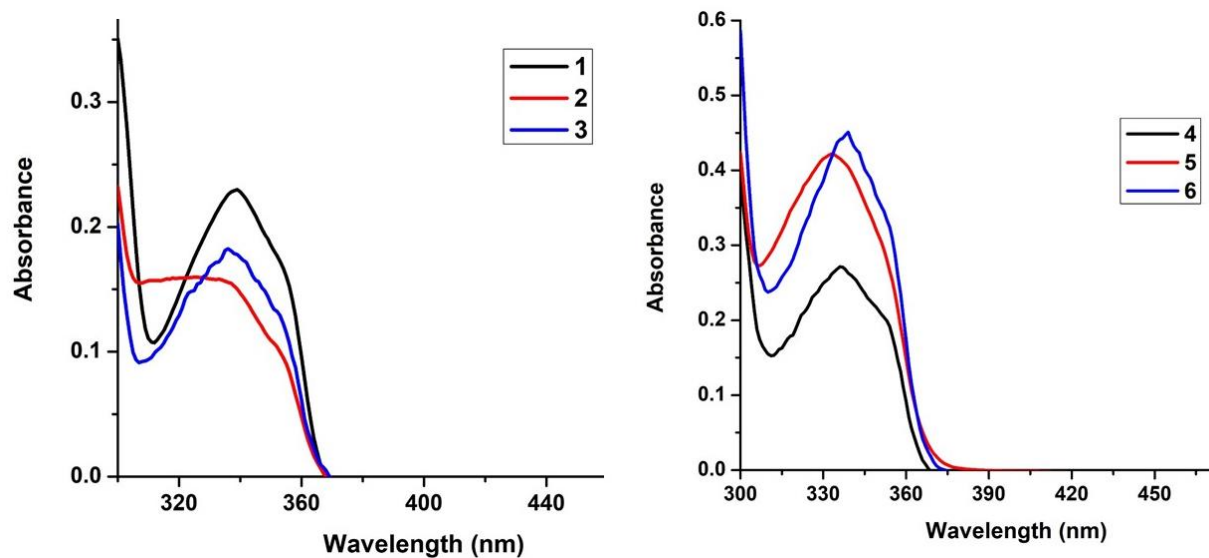

**Fig S45:** Absorbance spectra of compounds 1-3 (left) and 4-6 (right) in THF at  $1 \times 10^{-5}$  M concentration

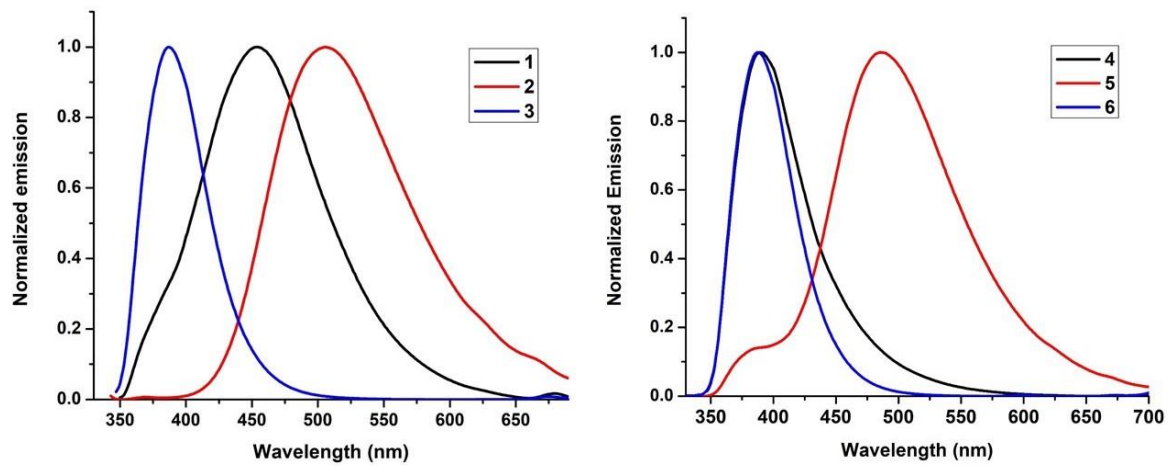

**Fig. S46.** Normalized Emission spectra of compounds 1-3 (left) and 4-6 (right) in THF at  $1 \times 10^{-5}$  M concentration



## Electronic Supporting information

**Table S4.** Calculated excitation energy (E), oscillator strength (f), and wavelength for absorption in dichloromethane solution for L1-L6 and complexes 1, 3, 4 and 6.

| Compound              | States               | Main Orbital transition (CIC) <sup>a</sup> | Oscillator strength(f) | Excitation energy (E, eV) | Wavelength $\lambda$ (nm) |
|-----------------------|----------------------|--------------------------------------------|------------------------|---------------------------|---------------------------|
| Ligand 1<br>60 root   | S0 $\rightarrow$ S2  | H $\rightarrow$ L <sup>b</sup> (0.50)      | 0.4624                 | 3.8854                    | 319.1                     |
|                       | S0 $\rightarrow$ S5  | H-2 $\rightarrow$ L (0.37)                 | 0.1077                 | 4.3379                    | 285.82                    |
|                       | S0 $\rightarrow$ S7  | H-3 $\rightarrow$ L (0.64)                 | 0.2281                 | 4.5025                    | 275.37                    |
|                       | S0 $\rightarrow$ S11 | H $\rightarrow$ L+2 (0.62)                 | 0.1325                 | 4.7544                    | 260.78                    |
| Ligand 2<br>20 root   | S0 $\rightarrow$ S2  | H-1 $\rightarrow$ L (0.70)                 | 0.5185                 | 3.8974                    | 318.12                    |
|                       | S0 $\rightarrow$ S4  | H $\rightarrow$ L+2 (0.67)                 | 0.3634                 | 4.1253                    | 300.55                    |
|                       | S0 $\rightarrow$ S5  | H-3 $\rightarrow$ L (0.52)                 | 0.1746                 | 4.4759                    | 277                       |
| Ligand 3<br>40 root   | S0 $\rightarrow$ S1  | H $\rightarrow$ L (0.69)                   | 0.5388                 | 3.8888                    | 318.82                    |
|                       | S0 $\rightarrow$ S4  | H-2 $\rightarrow$ L (0.58)                 | 0.1965                 | 4.4889                    | 276.2                     |
|                       | S0 $\rightarrow$ S9  | H $\rightarrow$ L+2 (0.68)                 | 0.4818                 | 4.9267                    | 251.66                    |
| Ligand 4<br>60 root   | S0 $\rightarrow$ S2  | H-1 $\rightarrow$ L                        | 0.6240                 | 3.8696                    | 320.40                    |
|                       | S0 $\rightarrow$ S10 | H-3 $\rightarrow$ L                        | 0.1599                 | 4.3324                    | 286.18                    |
|                       | S0 $\rightarrow$ S12 | H-3 $\rightarrow$ L+2                      | 0.1723                 | 4.4483                    | 278.72                    |
| Ligand 5<br>60 root   | S0 $\rightarrow$ S3  | H-2 $\rightarrow$ L                        | 0.4981                 | 3.8891                    | 318.8                     |
| Ligand 6<br>60 root   | S0 $\rightarrow$ S2  | H-1 $\rightarrow$ L+1                      | 0.5393                 | 3.8887                    | 318.83                    |
|                       | S0 $\rightarrow$ S11 | H-4 $\rightarrow$ L                        | 0.6176                 | 4.4915                    | 276.04                    |
| Complex 1<br>60 root  | S0 $\rightarrow$ S2  | H-1 $\rightarrow$ L                        | 0.4425                 | 3.7602                    | 329.73                    |
|                       | S0 $\rightarrow$ S7  | H-3 $\rightarrow$ L                        | 0.3045                 | 4.3688                    | 283.79                    |
|                       | S0 $\rightarrow$ S8  | H-4 $\rightarrow$ L                        | 0.1224                 | 4.5046                    | 275.24                    |
| Complex 2<br>60 roots | S0 $\rightarrow$ S2  | H-1 $\rightarrow$ L                        | 0.4468                 | 3.7672                    | 329.11                    |
|                       | S0 $\rightarrow$ S5  | H-2 $\rightarrow$ L                        | 0.3518                 | 4.3707                    | 283.67                    |
| Complex 3<br>60 root  | S0 $\rightarrow$ S1  | H $\rightarrow$ L                          | 0.4464                 | 3.7560                    | 330.1                     |
|                       | S0 $\rightarrow$ S3  | H-2 $\rightarrow$ L                        | 0.3611                 | 4.3673                    | 283.89                    |
|                       | S0 $\rightarrow$ S9  | H-1 $\rightarrow$ L+2                      | 0.4571                 | 5.0313                    | 246.43                    |
| Complex 4<br>60 root  | S0 $\rightarrow$ S2  | H-1 $\rightarrow$ L+1                      | 0.4415                 | 3.7552                    | 330.17                    |
|                       | S0 $\rightarrow$ S13 | H-3 $\rightarrow$ L+2                      | 0.3643                 | 4.3801                    | 283.06                    |
|                       | S0 $\rightarrow$ S15 | H-6 $\rightarrow$ L                        | 0.1415                 | 4.4933                    | 275.93                    |
| Complex 5<br>60 root  | S0 $\rightarrow$ S3  | H-2 $\rightarrow$ L                        | 0.4823                 | 3.7493                    | 330.68                    |
|                       | S0 $\rightarrow$ S10 | H-3 $\rightarrow$ L+1                      | 0.4289                 | 4.3686                    | 283.81                    |
| Complex 6<br>60 root  | S0 $\rightarrow$ S2  | H $\rightarrow$ L+1                        | 0.4830                 | 3.7555                    | 330.14                    |
|                       | S0 $\rightarrow$ S7  | H-4 $\rightarrow$ L                        | 0.6628                 | 4.3740                    | 283.25                    |
|                       | S0 $\rightarrow$ S20 | H-2 $\rightarrow$ L+3                      | 0.5626                 | 4.9480                    | 250.58                    |

<sup>a</sup>Ci expansion coefficients for the main orbital transitions.

<sup>b</sup>H denotes HOMO and L denotes LUMO

## Electronic Supporting information

**Table S5.** HOMO-LUMO energies for **L1-L6** obtained from DFT calculation along with respective quantum yields obtained experimentally

| Ligands  | E <sub>HOMO</sub> [eV] | E <sub>LUMO</sub> [eV] | H-L <sup>o</sup> gap [eV] from theory | Quantum yield <sup>b</sup> |
|----------|------------------------|------------------------|---------------------------------------|----------------------------|
| Ligand 1 | -5.45                  | -1.43                  | 4.02                                  | 31.59%                     |
| Ligand 2 | -5.43                  | -1.08                  | 4.35                                  | 38.21%                     |
| Ligand 3 | -5.56                  | -1.21                  | 4.35                                  | 40.53%                     |
| Ligand 4 | -5.53                  | -1.62                  | 3.91                                  | 14.53%                     |
| Ligand 5 | -5.52                  | -1.34                  | 4.18                                  | 17.73%                     |
| Ligand 6 | -5.63                  | -1.32                  | 4.31                                  | 35.01%                     |

<sup>a</sup>H denotes HOMO and L denotes LUMO, <sup>b</sup>Absolute Quantum Yield (Using Integrating Sphere)

**Table S6.** HOMO-LUMO energies for complexes **1- 6** obtained from DFT calculation along with respective quantum yields obtained experimentally

| Complexes | E <sub>HOMO</sub> [eV] | E <sub>LUMO</sub> [eV] | H-L <sup>o</sup> gap [eV] from theory | Quantum yield <sup>b</sup> |
|-----------|------------------------|------------------------|---------------------------------------|----------------------------|
| Complex 1 | -5.78                  | -1.65                  | 4.13                                  | 3.79%                      |
| Complex 2 | -5.77                  | -1.56                  | 4.21                                  | 2.44%                      |
| Complex 3 | -5.88                  | -1.69                  | 4.19                                  | 6.56%                      |
| Complex 4 | -5.94                  | -2.04                  | 3.9                                   | 1.62%                      |
| Complex 5 | -5.93                  | -1.87                  | 4.06                                  | 6.08%                      |
| Complex 6 | -6.04                  | -1.86                  | 4.18                                  | 14.98%                     |

<sup>a</sup>H denotes HOMO and L denotes LUMO, <sup>b</sup>Absolute Quantum Yield (Using Integrating Sphere)

## Electronic Supporting information

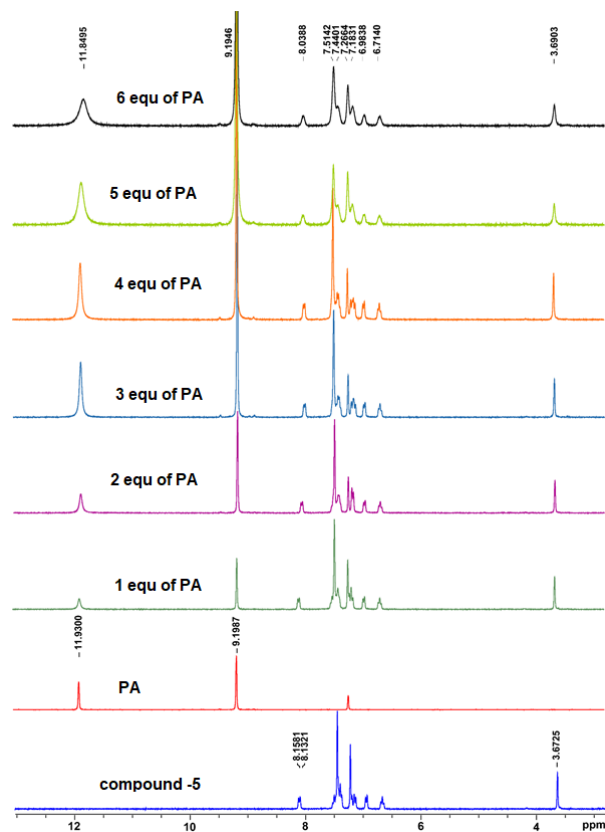

Fig. S47. Partial  $^1\text{H}$  NMR spectra of compound **5** and PA with different mol ratio in  $\text{CDCl}_3$ .

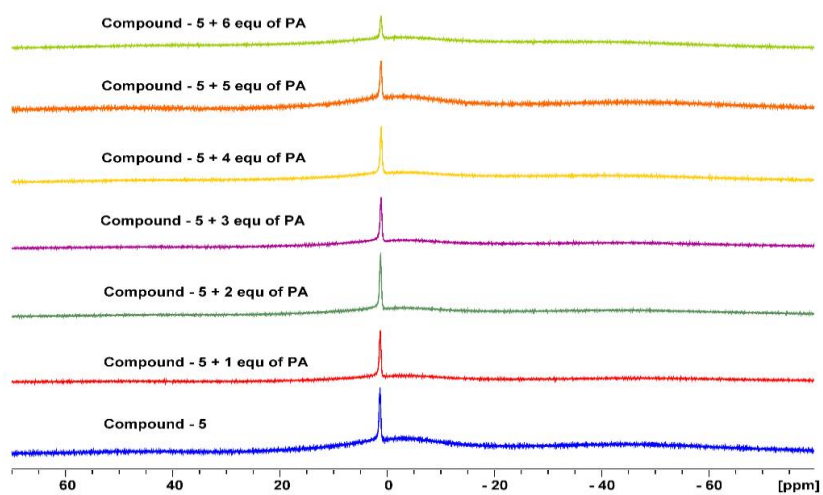

Fig. S48.  $^{11}\text{B}$  NMR spectra of compound **5** and PA with different mol ratio in  $\text{CDCl}_3$ .

# Electronic Supporting information

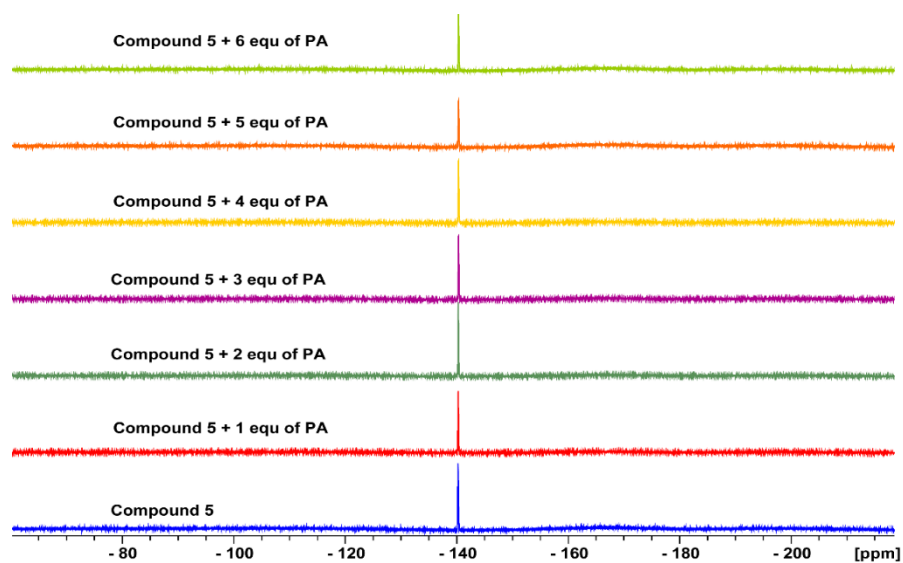

Fig. S49.  $^{19}\text{F}$  NMR spectra of compound **5** and PA with different mol ratio in  $\text{CDCl}_3$ .

(a)

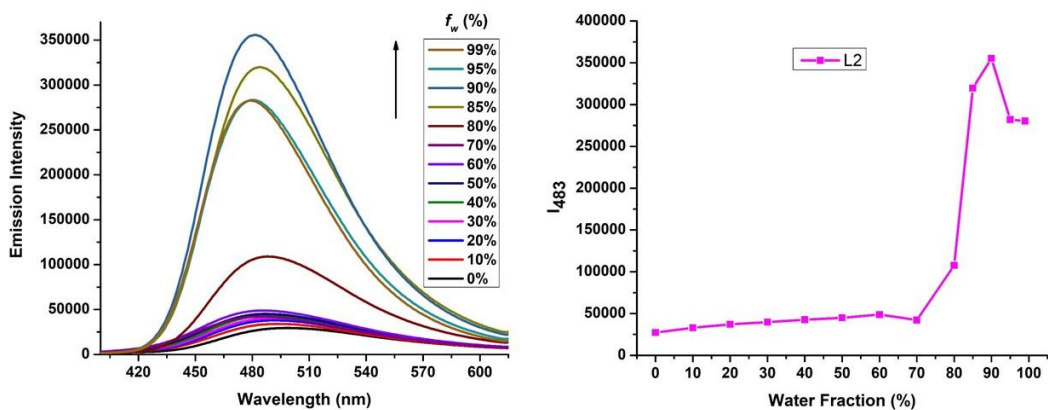

(b)

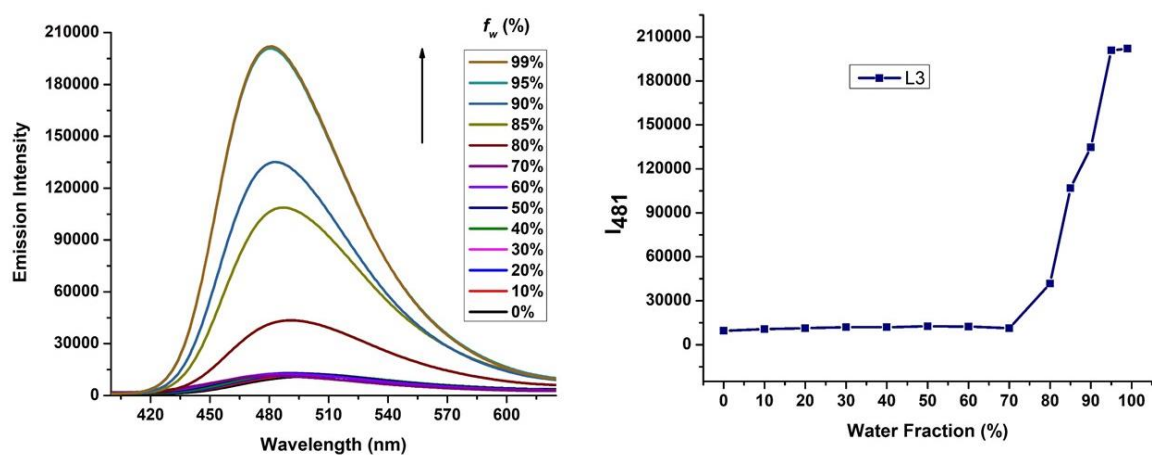

Electronic Supporting information

(c)

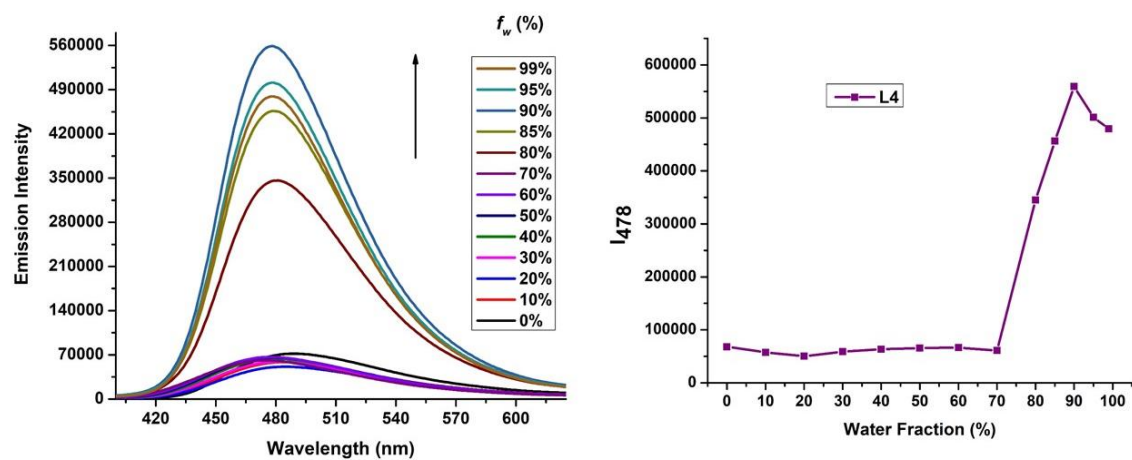

(d)

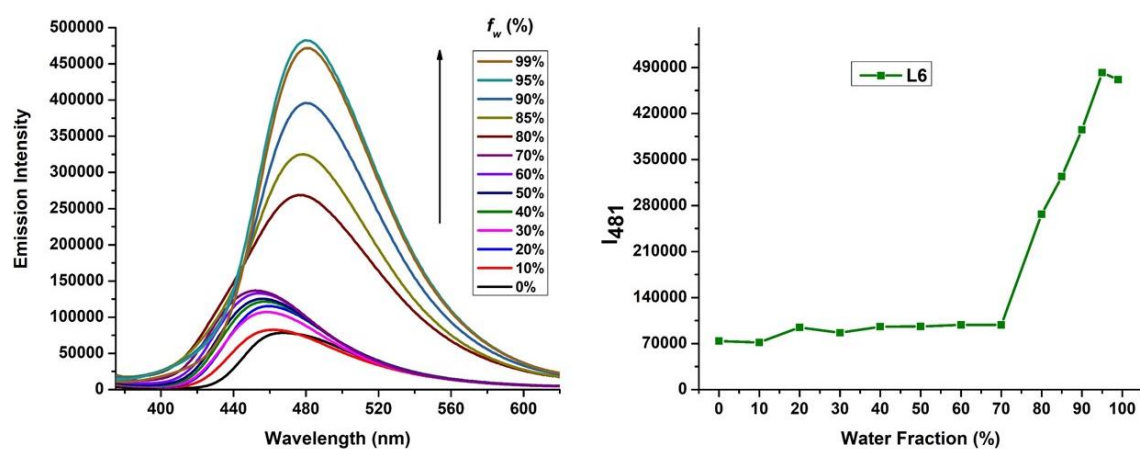

**Fig S50:** Emission spectrum (Left) of L2-L4 and L6 in THF/water mixtures with different fractions of water ( $f_w$ ) (concentration = 10  $\mu$ M). (Right) Relative intensity vs water fraction (vol %) in THF/Water mixtures; [L2-L4 and L6] = 10  $\mu$ M

## Electronic Supporting information

**Table S7.** Optimized geometries for **L1-L6** and complexes **1- 6**

|          |    |             |             |             |
|----------|----|-------------|-------------|-------------|
| Ligand 1 | Br | 5.57937847  | 1.60067816  | -2.11044309 |
|          | N  | -2.42229737 | 0.66366511  | 0.32655376  |
|          | O  | -6.08105412 | -0.65792798 | -1.36297278 |
|          | H  | -5.77467705 | 0.20898800  | -0.97200993 |
|          | N  | 2.36710028  | -1.85257152 | 1.67980775  |
|          | N  | -4.51646980 | 1.11484579  | -0.34789559 |
|          | C  | 1.15914426  | -0.30651419 | 0.49873957  |
|          | C  | -0.01041378 | 0.34991367  | 0.10472488  |
|          | H  | 0.00661215  | 1.13539997  | -0.64400235 |
|          | C  | 2.54965593  | -0.18446090 | 0.11960286  |
|          | C  | -1.21950988 | -0.02717364 | 0.68611801  |
|          | C  | -3.53837603 | 0.21549651  | -0.37920231 |
|          | C  | 1.09422276  | -1.34225328 | 1.47100736  |
|          | C  | 3.26130111  | -1.15099346 | 0.87819695  |
|          | C  | -4.05849614 | 2.18901837  | 0.38579709  |
|          | C  | -2.74306463 | 1.92922077  | 0.82108445  |
|          | C  | -3.69182181 | -1.05697852 | -1.08697385 |
|          | C  | 3.23366572  | 0.64188874  | -0.77872012 |
|          | H  | 2.71284697  | 1.38584286  | -1.37083567 |
|          | C  | 5.31502750  | -0.46594283 | -0.14196360 |
|          | H  | 6.38868178  | -0.55071187 | -0.26237662 |
|          | C  | -1.27032332 | -1.03927933 | 1.66379385  |
|          | H  | -2.22878726 | -1.29439209 | 2.10278012  |
|          | C  | 4.60856447  | 0.48549678  | -0.89367848 |
|          | C  | 4.64657758  | -1.29444740 | 0.75480262  |
|          | H  | 5.20047761  | -2.02367964 | 1.33636797  |
|          | C  | -0.12024622 | -1.71131436 | 2.06076574  |
|          | H  | -0.17548369 | -2.49000461 | 2.81378605  |

## Electronic Supporting information

|          |    |             |             |             |
|----------|----|-------------|-------------|-------------|
|          | C  | -4.99754174 | -1.42929375 | -1.53164065 |
|          | C  | 2.72250886  | -2.88412090 | 2.64488179  |
|          | H  | 3.56719614  | -3.44675548 | 2.23533272  |
|          | H  | 1.88603599  | -3.58713362 | 2.70523231  |
|          | C  | -2.61953146 | -1.92644291 | -1.37470397 |
|          | H  | -1.61527236 | -1.64424778 | -1.08908678 |
|          | C  | -4.68664689 | 3.39433943  | 0.72186883  |
|          | H  | -5.69797694 | 3.59948507  | 0.38676177  |
|          | C  | -2.02143620 | 2.83393490  | 1.60014091  |
|          | H  | -1.01247800 | 2.61849117  | 1.93489531  |
|          | C  | -5.18078421 | -2.66138485 | -2.18118076 |
|          | H  | -6.18777149 | -2.91723784 | -2.49311912 |
|          | C  | -3.97197837 | 4.30467226  | 1.49358222  |
|          | H  | -4.43203868 | 5.24856714  | 1.76963180  |
|          | C  | -2.81490071 | -3.13179104 | -2.03382963 |
|          | H  | -1.96754008 | -3.77600085 | -2.24464129 |
|          | C  | -2.66055408 | 4.02803284  | 1.92731647  |
|          | H  | -2.13475147 | 4.76182382  | 2.53054759  |
|          | C  | -4.10659900 | -3.50273660 | -2.42707431 |
|          | H  | -4.27103048 | -4.44683816 | -2.93882602 |
|          | C  | 3.06411440  | -2.33073061 | 4.03170314  |
|          | H  | 2.21468285  | -1.78844023 | 4.45667448  |
|          | H  | 3.91362178  | -1.64381125 | 3.98040052  |
|          | H  | 3.32415805  | -3.14816640 | 4.71156162  |
| Ligand 2 | Br | 7.22137695  | 0.45377337  | -1.44501203 |
|          | N  | 2.25021654  | -0.81922826 | 1.90820119  |
|          | N  | -3.00955124 | -0.65455319 | -0.16095981 |
|          | N  | -5.09689144 | -0.04510437 | -0.72158096 |
|          | C  | 0.95280042  | -0.73892745 | 1.39595659  |

## Electronic Supporting information

|   |             |             |             |
|---|-------------|-------------|-------------|
| C | 0.70569526  | -0.91725611 | 0.01601587  |
| H | 1.53359926  | -1.10079694 | -0.65824650 |
| C | 3.38733464  | -0.52540067 | 1.10077046  |
| O | -6.02427435 | 2.32439911  | -0.37928171 |
| H | -5.99894777 | 1.34632409  | -0.58665839 |
| C | -3.90404076 | 0.40009831  | -0.33855084 |
| C | -3.70679370 | -1.82557592 | -0.46093773 |
| C | -0.58657811 | -0.87310597 | -0.48867429 |
| H | -0.75844747 | -1.00799864 | -1.55192906 |
| C | -0.15706573 | -0.53695962 | 2.24293786  |
| H | -0.01824462 | -0.39536037 | 3.30716501  |
| C | -1.67687611 | -0.66032964 | 0.36260772  |
| C | 3.44890416  | 0.64075320  | 0.32330218  |
| H | 2.60715503  | 1.32527122  | 0.31731850  |
| C | -3.32139097 | -3.16626974 | -0.44530562 |
| H | -2.31620665 | -3.46578739 | -0.16886316 |
| C | 4.48762846  | -1.39410845 | 1.10443647  |
| H | 4.44344602  | -2.30956748 | 1.68625568  |
| C | 5.66491839  | 0.05597893  | -0.41079192 |
| C | 4.57834163  | 0.92873740  | -0.43957795 |
| H | 4.62044574  | 1.83183029  | -1.03771482 |
| C | -5.01075944 | -1.41847497 | -0.80864377 |
| C | 2.44597646  | -0.85831708 | 3.35475743  |
| H | 2.18628459  | 0.09542633  | 3.83765195  |
| H | 3.49499158  | -1.06439803 | 3.56468918  |
| H | 1.84051727  | -1.65126143 | 3.80494549  |
| C | 5.62975308  | -1.10362645 | 0.36059469  |
| H | 6.47681112  | -1.77992661 | 0.36798481  |
| C | -1.45139069 | -0.51057304 | 1.73078481  |



## Electronic Supporting information

|          |    |             |             |             |
|----------|----|-------------|-------------|-------------|
|          | H  | -2.29359641 | -0.35449013 | 2.39717190  |
|          | C  | -4.29134918 | -4.10089730 | -0.80156949 |
|          | H  | -4.03443077 | -5.15581996 | -0.80466068 |
|          | C  | -3.64751516 | 1.82970334  | -0.15103641 |
|          | C  | -5.97425064 | -2.36984693 | -1.16504083 |
|          | H  | -6.97867399 | -2.06106480 | -1.43522448 |
|          | C  | -5.59691763 | -3.70873510 | -1.15721631 |
|          | H  | -6.32178410 | -4.46984334 | -1.42948290 |
|          | C  | -2.36074146 | 2.37844384  | 0.02749893  |
|          | H  | -1.49791976 | 1.72698715  | 0.00520485  |
|          | C  | -4.76227757 | 2.72386552  | -0.16937289 |
|          | C  | -4.55058622 | 4.09689715  | 0.04056606  |
|          | H  | -5.42148198 | 4.74362292  | 0.03182854  |
|          | C  | -3.27297341 | 4.59891395  | 0.23372584  |
|          | H  | -3.13292927 | 5.66530537  | 0.38692973  |
|          | C  | -2.16772127 | 3.73942773  | 0.21732222  |
|          | H  | -1.16375098 | 4.12999808  | 0.34833164  |
| Ligand 3 | Br | 7.43254     | -0.30752    | -1.07341    |
|          | O  | 2.27048     | 0.71864     | 1.93654     |
|          | O  | -5.97554    | -2.2844     | -0.26152    |
|          | H  | -5.95901    | -1.30247    | -0.44368    |
|          | N  | -5.05095    | 0.09552     | -0.5924     |
|          | N  | -2.93966    | 0.67239     | -0.0905     |
|          | C  | 5.79062     | 0.01419     | -0.15041    |
|          | C  | -4.96133    | 1.47158     | -0.61988    |
|          | C  | -3.847      | -0.37062    | -0.27918    |
|          | C  | -3.58673    | -1.80695    | -0.16912    |
|          | C  | 3.40573     | 0.48237     | 1.18155     |

## Electronic Supporting information

|   |          |          |          |
|---|----------|----------|----------|
| C | -3.64254 | 1.8595   | -0.30804 |
| C | 1.01898  | 0.67315  | 1.36557  |
| C | -0.03962 | 0.37464  | 2.22979  |
| H | 0.17798  | 0.15567  | 3.2693   |
| C | -1.34477 | 0.37445  | 1.75072  |
| H | -2.1727  | 0.14852  | 2.41421  |
| C | -4.70489 | -2.69608 | -0.14936 |
| C | 4.72967  | -0.87676 | -0.30784 |
| H | 4.84     | -1.74839 | -0.94259 |
| C | -1.59625 | 0.6488   | 0.40202  |
| C | 0.77401  | 0.97356  | 0.02187  |
| H | 1.59409  | 1.21902  | -0.6427  |
| C | 5.67242  | 1.13353  | 0.67115  |
| H | 6.50624  | 1.81618  | 0.78674  |
| C | -3.25198 | 3.1972   | -0.24453 |
| H | -2.23615 | 3.48337  | 0.00589  |
| C | 4.47061  | 1.36936  | 1.33742  |
| H | 4.35018  | 2.23215  | 1.98347  |
| C | -0.53608 | 0.95493  | -0.45484 |
| H | -0.74001 | 1.17782  | -1.49709 |
| C | 3.53177  | -0.6454  | 0.36617  |
| H | 2.70365  | -1.33813 | 0.26308  |
| C | -4.48713 | -4.0766  | -0.00615 |
| H | -5.35981 | -4.72041 | 0.01903  |
| C | -5.93472 | 2.44031  | -0.89219 |
| H | -6.95044 | 2.14618  | -1.13482 |
| C | -2.29353 | -2.36549 | -0.10377 |
| H | -1.43054 | -1.71628 | -0.1646  |
| C | -4.23228 | 4.14922  | -0.5169  |

## Electronic Supporting information

|          |   |          |          |          |
|----------|---|----------|----------|----------|
|          | H | -3.9717  | 5.20253  | -0.48027 |
|          | C | -2.09514 | -3.7332  | 0.01892  |
|          | H | -1.08694 | -4.13201 | 0.063    |
|          | C | -5.55237 | 3.77663  | -0.83746 |
|          | H | -6.28474 | 4.55095  | -1.04419 |
|          | C | -3.20192 | -4.58899 | 0.07989  |
|          | H | -3.05753 | -5.6608  | 0.18218  |
| Ligand 4 | N | 0.00462  | -0.65192 | 3.26688  |
|          | O | -7.62078 | -0.58594 | -1.6267  |
|          | H | -7.16303 | 0.29071  | -1.76802 |
|          | N | 3.94652  | -0.72999 | -0.67765 |
|          | N | -3.92876 | 1.03194  | -0.31038 |
|          | N | 5.81645  | -0.39646 | -1.87589 |
|          | N | -5.79184 | 1.22416  | -1.54958 |
|          | O | 7.65371  | 1.26708  | -1.17942 |
|          | H | 7.19301  | 0.53385  | -1.67743 |
|          | C | 0.71191  | -0.35669 | 1.10845  |
|          | C | 1.10347  | -0.73262 | 2.42203  |
|          | C | -1.09705 | -0.25312 | 2.52186  |
|          | C | -1.64224 | 0.36448  | 0.22598  |
|          | H | -1.37087 | 0.51852  | -0.81348 |
|          | C | 2.97216  | -0.70109 | 0.37176  |
|          | C | -0.70015 | -0.05029 | 1.1722   |
|          | C | 3.34479  | -1.09351 | 1.67196  |
|          | H | 4.37394  | -1.38228 | 1.85578  |
|          | C | 1.65873  | -0.33877 | 0.07977  |
|          | H | 1.39229  | -0.04361 | -0.93005 |
|          | C | 2.42091  | -1.10649 | 2.71018  |
|          | H | 2.72351  | -1.40921 | 3.70673  |

## Electronic Supporting information

|   |          |          |          |
|---|----------|----------|----------|
| C | -3.99795 | 2.36096  | -0.73369 |
| C | 4.01198  | -1.75829 | -1.62033 |
| C | -2.95813 | 0.56942  | 0.63597  |
| C | -5.04625 | 0.38537  | -0.83832 |
| C | -2.41888 | -0.04459 | 2.93128  |
| H | -2.72993 | -0.20114 | 3.95844  |
| C | -5.17252 | 2.45585  | -1.50734 |
| C | -0.00961 | -1.01151 | 4.67939  |
| H | -0.74288 | -0.37098 | 5.17878  |
| H | 0.96551  | -0.74737 | 5.09979  |
| C | -3.33813 | 0.37823  | 1.97844  |
| H | -4.37045 | 0.55594  | 2.25967  |
| C | 5.07042  | 0.07085  | -0.88068 |
| C | -3.16648 | 3.45652  | -0.50017 |
| H | -2.26948 | 3.37245  | 0.10382  |
| C | -5.4176  | -1.02178 | -0.67884 |
| C | 5.4471   | 1.27824  | -0.14337 |
| C | 5.19102  | -1.5274  | -2.3577  |
| C | 4.57762  | 1.96599  | 0.72817  |
| H | 3.56215  | 1.61471  | 0.85201  |
| C | -6.72838 | -1.42385 | -1.08043 |
| C | 6.76188  | 1.80351  | -0.33452 |
| C | 3.17389  | -2.84465 | -1.87231 |
| H | 2.27335  | -3.01596 | -1.2925  |
| C | -7.12544 | -2.75985 | -0.90389 |
| H | -8.13223 | -3.02653 | -1.20718 |
| C | -4.54662 | -2.00827 | -0.17218 |
| H | -3.53384 | -1.73696 | 0.09353  |
| C | 5.55517  | -2.39535 | -3.39417 |

## Electronic Supporting information

|          |   |          |          |          |
|----------|---|----------|----------|----------|
|          | H | 6.4603   | -2.21972 | -3.96599 |
|          | C | -5.53876 | 3.67738  | -2.08523 |
|          | H | -6.44042 | 3.75419  | -2.68374 |
|          | C | -4.9483  | -3.32794 | -0.02189 |
|          | H | -4.25207 | -4.06431 | 0.36612  |
|          | C | -3.54507 | 4.66521  | -1.08077 |
|          | H | -2.92555 | 5.54337  | -0.92671 |
|          | C | -6.25032 | -3.6988  | -0.37987 |
|          | H | -6.57652 | -4.72817 | -0.26082 |
|          | C | 4.98424  | 3.09765  | 1.42053  |
|          | H | 4.28913  | 3.60695  | 2.08002  |
|          | C | 4.72174  | -3.47776 | -3.65618 |
|          | H | 4.97695  | -4.16791 | -4.45446 |
|          | C | -4.71193 | 4.77355  | -1.8625  |
|          | H | -4.96892 | 5.73416  | -2.29825 |
|          | C | 6.28986  | 3.57636  | 1.25571  |
|          | H | 6.61991  | 4.45825  | 1.79749  |
|          | C | 7.16377  | 2.93909  | 0.3884   |
|          | H | 8.17341  | 3.30216  | 0.22855  |
|          | C | 3.55041  | -3.69989 | -2.90586 |
|          | H | 2.92568  | -4.55701 | -3.13774 |
|          | C | -0.32394 | -2.48951 | 4.92902  |
|          | H | -1.30801 | -2.75326 | 4.53133  |
|          | H | -0.32059 | -2.69982 | 6.00305  |
|          | H | 0.41936  | -3.13408 | 4.45131  |
| Ligand 5 | N | 4.62328  | 0.75292  | -0.46144 |
|          | N | -7.04878 | 0.80822  | -0.01839 |
|          | N | 6.75474  | 1.45262  | -0.57661 |
|          | N | 0.03862  | -2.53822 | -0.03043 |

## Electronic Supporting information

|   |          |          |          |
|---|----------|----------|----------|
| O | 8.74928  | -0.07266 | 0.02999  |
| H | 8.24696  | 0.71071  | -0.32981 |
| O | -7.03236 | 3.08255  | 1.18297  |
| H | -7.35075 | 2.32273  | 0.61722  |
| C | 3.47197  | -0.0861  | -0.33851 |
| C | 1.17524  | -1.69162 | -0.14541 |
| N | -5.24049 | -0.51485 | -0.17223 |
| C | 1.27501  | -0.49708 | 0.58559  |
| H | 0.46285  | -0.2005  | 1.24028  |
| C | 5.95087  | 0.50467  | -0.11007 |
| C | 2.41031  | 0.30298  | 0.48345  |
| H | 2.48951  | 1.21831  | 1.06103  |
| C | 4.61898  | 1.94422  | -1.19222 |
| C | -1.56556 | -0.82609 | -0.71987 |
| H | -0.77973 | -0.29572 | -1.24436 |
| C | -1.26234 | -2.02101 | -0.02939 |
| C | 6.46362  | -0.62029 | 0.67321  |
| C | 5.96462  | 2.36049  | -1.25121 |
| C | 3.37944  | -1.26917 | -1.07738 |
| H | 4.1959   | -1.5571  | -1.73104 |
| C | -6.19413 | -1.02845 | -1.05289 |
| C | 5.64654  | -1.46883 | 1.44794  |
| H | 4.5832   | -1.2765  | 1.5043   |
| C | -2.86099 | -0.33262 | -0.75761 |
| H | -3.07792 | 0.58234  | -1.29925 |
| C | -5.21172 | 1.48126  | 1.43589  |
| C | -3.89909 | -1.00976 | -0.10668 |
| C | 2.24081  | -2.06262 | -0.98125 |
| H | 2.16452  | -2.96801 | -1.57469 |

## Electronic Supporting information

|   |          |          |          |
|---|----------|----------|----------|
| C | -5.81549 | 0.60256  | 0.43226  |
| C | -5.2979  | 3.59002  | 2.67508  |
| H | -5.82035 | 4.51985  | 2.87305  |
| C | 7.87235  | -0.85402 | 0.67658  |
| C | 6.30935  | 3.53624  | -1.92841 |
| H | 7.34341  | 3.86132  | -1.9737  |
| C | 3.58871  | 2.65893  | -1.80347 |
| H | 2.55797  | 2.32406  | -1.76038 |
| C | -5.87273 | 2.71029  | 1.74255  |
| C | -2.32067 | -2.70431 | 0.60195  |
| H | -2.1376  | -3.62446 | 1.14218  |
| C | -7.31665 | -0.18341 | -0.93861 |
| C | 7.55197  | -2.78273 | 2.11528  |
| H | 7.97432  | -3.61928 | 2.66472  |
| C | 6.17417  | -2.53579 | 2.16103  |
| H | 5.52023  | -3.16738 | 2.75343  |
| C | 3.948    | 3.82613  | -2.47432 |
| H | 3.17704  | 4.41471  | -2.96196 |
| C | 5.28697  | 4.2591   | -2.53417 |
| H | 5.52282  | 5.17569  | -3.06596 |
| C | 8.38814  | -1.95134 | 1.3859   |
| H | 9.46093  | -2.1087  | 1.35404  |
| C | -4.02586 | 1.17353  | 2.1342   |
| H | -3.53255 | 0.22841  | 1.95187  |
| C | -3.6205  | -2.20269 | 0.55885  |
| H | -4.42256 | -2.73409 | 1.06129  |
| C | -6.16466 | -2.11841 | -1.92306 |
| H | -5.2909  | -2.75553 | -2.00757 |
| C | 0.25731  | -3.90585 | 0.43439  |

## Electronic Supporting information

|          |   |          |          |          |
|----------|---|----------|----------|----------|
|          | H | 1.28457  | -4.19703 | 0.21936  |
|          | H | -0.41459 | -4.59858 | -0.08135 |
|          | H | 0.0994   | -4.00737 | 1.51815  |
|          | C | -8.46284 | -0.42725 | -1.70485 |
|          | H | -9.32991 | 0.21919  | -1.61855 |
|          | C | -8.44416 | -1.5157  | -2.57082 |
|          | H | -9.31822 | -1.73068 | -3.17793 |
|          | C | -4.11811 | 3.26513  | 3.32648  |
|          | H | -3.69678 | 3.9572   | 4.05016  |
|          | C | -7.31217 | -2.3472  | -2.6795  |
|          | H | -7.33345 | -3.18563 | -3.36899 |
|          | C | -3.48127 | 2.04543  | 3.06626  |
|          | H | -2.57045 | 1.77632  | 3.59134  |
| Ligand 6 | O | -0.04021 | 0.72531  | -2.65522 |
|          | N | 4.90972  | -0.39942 | -0.31291 |
|          | O | 7.60924  | 1.90156  | 2.00892  |
|          | H | 7.67715  | 1.01464  | 1.55628  |
|          | N | 6.89973  | -0.21058 | 0.71051  |
|          | N | -5.14355 | 0.25058  | -0.4232  |
|          | N | -6.88134 | -0.24333 | 0.91092  |
|          | O | -6.70849 | -1.92981 | 2.85633  |
|          | H | -7.08075 | -1.21361 | 2.26933  |
|          | C | -1.26248 | 0.56629  | -2.03695 |
|          | C | 1.13944  | 0.44125  | -1.99918 |
|          | C | 5.70585  | -1.4483  | -0.78006 |
|          | C | 3.62702  | -0.09595 | -0.86824 |
|          | C | 6.94605  | -1.30723 | -0.12504 |
|          | C | 5.68836  | 0.32084  | 0.59432  |
|          | C | -2.32023 | 0.15169  | -2.84931 |



## Electronic Supporting information

|   |          |          |          |
|---|----------|----------|----------|
| H | -2.12519 | -0.07764 | -3.89104 |
| C | 2.23429  | 1.25103  | -2.31226 |
| H | 2.09599  | 2.08057  | -2.99675 |
| C | 3.47928  | 0.97414  | -1.75672 |
| H | 4.33744  | 1.59231  | -1.99744 |
| C | -3.8221  | 0.337    | -0.96382 |
| C | -5.6617  | -0.61539 | 0.54063  |
| C | 2.52957  | -0.90664 | -0.56459 |
| H | 2.6553   | -1.74122 | 0.11732  |
| C | -6.12233 | 1.21929  | -0.65913 |
| C | -7.19911 | 0.88818  | 0.18831  |
| C | -5.01263 | -1.79649 | 1.11133  |
| C | 5.29422  | 1.50621  | 1.35687  |
| C | 1.28362  | -0.64665 | -1.1329  |
| H | 0.43457  | -1.28084 | -0.90493 |
| C | -3.60016 | 0.03984  | -2.31181 |
| H | -4.42826 | -0.29113 | -2.92979 |
| C | -1.47985 | 0.88262  | -0.69177 |
| H | -0.65911 | 1.22413  | -0.0715  |
| C | 5.45953  | -2.46471 | -1.70318 |
| H | 4.50457  | -2.55717 | -2.20918 |
| C | -2.76215 | 0.76982  | -0.16123 |
| H | -2.94657 | 1.0182   | 0.87852  |
| C | 7.98383  | -2.2118  | -0.37928 |
| H | 8.93905  | -2.10827 | 0.12454  |
| C | 6.31563  | 2.25279  | 2.01996  |
| C | 3.95935  | 1.93932  | 1.49455  |
| H | 3.1639   | 1.36077  | 1.04413  |
| C | -8.35592 | 1.67662  | 0.19788  |

## Electronic Supporting information

|           |    |             |            |             |
|-----------|----|-------------|------------|-------------|
|           | H  | -9.18798    | 1.42409    | 0.84666     |
|           | C  | 7.74443     | -3.23288   | -1.29306    |
|           | H  | 8.52963     | -3.9503    | -1.51071    |
|           | C  | 6.50257     | -3.35615   | -1.94616    |
|           | H  | 6.3537      | -4.1638    | -2.65622    |
|           | C  | -6.14846    | 2.33054    | -1.50188    |
|           | H  | -5.30952    | 2.58124    | -2.1421     |
|           | C  | -8.39342    | 2.78275    | -0.6447     |
|           | H  | -9.27714    | 3.41315    | -0.66003    |
|           | C  | -5.5865     | -2.38354   | 2.28005     |
|           | C  | 3.63376     | 3.08125    | 2.21209     |
|           | H  | 2.59636     | 3.3859     | 2.30375     |
|           | C  | 5.97148     | 3.41767    | 2.72577     |
|           | H  | 6.77428     | 3.968      | 3.20461     |
|           | C  | 4.65082     | 3.82884    | 2.81874     |
|           | H  | 4.40721     | 4.72794    | 3.37755     |
|           | C  | -7.30613    | 3.1057     | -1.47991    |
|           | H  | -7.37027    | 3.97916    | -2.12145    |
|           | C  | -3.86701    | -2.40334   | 0.55676     |
|           | H  | -3.44673    | -2.0081    | -0.35855    |
|           | C  | -3.27395    | -3.51235   | 1.14289     |
|           | H  | -2.39707    | -3.96152   | 0.68801     |
|           | C  | -3.82029    | -4.04864   | 2.31564     |
|           | H  | -3.35986    | -4.91276   | 2.78606     |
|           | C  | -4.96156    | -3.49314   | 2.8732      |
|           | H  | -5.41573    | -3.90393   | 3.76853     |
| Complex 1 | Br | 5.49605639  | 2.41902819 | -2.00047909 |
|           | F  | -6.14756201 | 0.35685118 | 0.53192041  |
|           | F  | -5.80951454 | 1.28527537 | -1.54081861 |

## Electronic Supporting information

|   |             |             |             |
|---|-------------|-------------|-------------|
| O | -4.74597001 | 2.23779347  | 0.31576811  |
| N | -3.99997031 | 0.07070701  | -0.52508214 |
| N | -2.02873325 | -0.85843556 | -0.12000474 |
| C | 3.44459353  | 0.81655454  | -0.81139542 |
| H | 2.77069403  | 1.38523120  | -1.44201940 |
| C | 1.65490163  | -0.70540616 | 0.33521777  |
| C | 2.97220558  | -0.18213943 | 0.04728757  |
| C | -2.90494989 | 0.13955900  | 0.24236198  |
| C | 0.37532000  | -0.40995860 | -0.13914637 |
| H | 0.21180172  | 0.36138040  | -0.88469819 |
| N | 3.17313633  | -1.82532258 | 1.63243991  |
| C | -0.52711509 | -2.13956557 | 1.32953201  |
| H | -1.39647150 | -2.67670255 | 1.69380327  |
| C | -2.76513954 | 1.18554934  | 1.23222285  |
| C | -3.85651300 | -0.97805552 | -1.41925858 |
| C | -0.70626547 | -1.12356960 | 0.37289824  |
| C | -2.61298482 | -1.57909911 | -1.16981426 |
| C | -4.25091590 | -2.53891095 | -3.16601028 |
| H | -4.87470307 | -2.93457907 | -3.96120751 |
| C | -4.69880152 | -1.44583839 | -2.43103198 |
| H | -5.64497507 | -0.95700665 | -2.62542547 |
| C | -3.73535653 | 2.23236830  | 1.17609521  |
| C | 4.81069948  | 1.06336623  | -0.83670045 |
| C | -2.15774936 | -2.67089040 | -1.90780681 |
| H | -1.19331728 | -3.12591899 | -1.71221397 |
| C | -3.60004983 | 3.32936837  | 2.04771544  |
| H | -4.33962824 | 4.11913244  | 1.97582841  |
| C | -3.00385734 | -3.14141789 | -2.90957492 |
| H | -2.69115823 | -3.99000556 | -3.50988709 |

### Electronic Supporting information

|                  |   |             |             |             |
|------------------|---|-------------|-------------|-------------|
|                  | C | 1.82877945  | -1.72490096 | 1.31366872  |
|                  | C | 0.74022735  | -2.45116023 | 1.81051114  |
|                  | H | 0.86674428  | -3.23807766 | 2.54597093  |
|                  | C | -1.63695408 | 2.33046105  | 3.05837853  |
|                  | H | -0.84207977 | 2.36322226  | 3.79598178  |
|                  | C | -2.56988318 | 3.37613032  | 2.97173952  |
|                  | H | -2.49252963 | 4.22660206  | 3.64317405  |
|                  | C | -1.73422310 | 1.25302687  | 2.19440053  |
|                  | H | -1.01404655 | 0.44907601  | 2.26629032  |
|                  | C | 3.88033731  | -0.90611299 | 0.86281805  |
|                  | C | 5.71123362  | 0.34565024  | -0.03410825 |
|                  | H | 6.76991393  | 0.57054888  | -0.08887719 |
|                  | B | -5.26743801 | 1.01119102  | -0.30518256 |
|                  | C | 5.25409509  | -0.64959534 | 0.82464061  |
|                  | H | 5.95736952  | -1.20321709 | 1.43745390  |
|                  | C | 3.76155714  | -2.79149854 | 2.55115885  |
|                  | H | 4.63027926  | -2.31865525 | 3.01949465  |
|                  | H | 3.04010654  | -2.97073898 | 3.35410694  |
|                  | C | 4.16036391  | -4.10830039 | 1.87829748  |
|                  | H | 4.89625103  | -3.93672362 | 1.08769702  |
|                  | H | 3.29094380  | -4.59914253 | 1.43172289  |
|                  | H | 4.59910887  | -4.79018093 | 2.61337017  |
| <b>Complex 2</b> | C | 1.59825700  | 0.84049900  | -1.43074000 |
|                  | C | 1.30225200  | 0.89492000  | -0.04869400 |
|                  | C | -0.00954400 | 0.85833500  | 0.40180000  |
|                  | C | -1.06897400 | 0.77161800  | -0.50761400 |
|                  | C | -0.79787800 | 0.74169300  | -1.87490500 |
|                  | C | 0.51558400  | 0.76580600  | -2.33408500 |
|                  | H | 2.10801200  | 0.97776600  | 0.67036200  |

## Electronic Supporting information

|    |             |             |             |
|----|-------------|-------------|-------------|
| H  | -0.21914200 | 0.90000200  | 1.46604200  |
| H  | 0.69161300  | 0.72073900  | -3.40106200 |
| N  | 2.91309200  | 0.91259600  | -1.88600000 |
| C  | 4.01301000  | 0.55488200  | -1.05026700 |
| C  | 4.04846100  | -0.67868000 | -0.38422900 |
| C  | 5.09983100  | 1.42923900  | -0.91744200 |
| C  | 5.14137900  | -1.02853200 | 0.40567700  |
| H  | 3.21578200  | -1.36683400 | -0.48671400 |
| C  | 6.20639000  | 1.07903500  | -0.14572800 |
| H  | 5.07335000  | 2.39377500  | -1.41496000 |
| C  | 6.21664900  | -0.14780700 | 0.51466000  |
| H  | 5.16490900  | -1.98327300 | 0.91845600  |
| H  | 7.04466700  | 1.75895700  | -0.04652900 |
| Br | 7.72292200  | -0.62868100 | 1.58546600  |
| N  | -2.42350800 | 0.76791900  | -0.03546700 |
| C  | -3.29147600 | -0.29211900 | 0.09396300  |
| C  | -3.12710800 | 1.93596900  | 0.28629700  |
| C  | -4.43437700 | 1.53694800  | 0.60533100  |
| N  | -4.49183300 | 0.15811800  | 0.48021200  |
| C  | -2.73579000 | 3.27399400  | 0.30940600  |
| C  | -5.41275200 | 2.47023800  | 0.95720500  |
| C  | -3.71051300 | 4.20146800  | 0.67038500  |
| C  | -5.02470500 | 3.80588000  | 0.98763700  |
| H  | -3.45108100 | 5.25499400  | 0.70334000  |
| H  | -5.75348800 | 4.56367300  | 1.25721800  |
| H  | -1.72489000 | 3.57370500  | 0.05698300  |
| H  | -6.42237500 | 2.14838300  | 1.17883000  |
| C  | -3.08255600 | -1.70097300 | -0.16295200 |
| C  | -1.82705300 | -2.29849800 | -0.40601400 |

## Electronic Supporting information

|                  |    |             |             |             |
|------------------|----|-------------|-------------|-------------|
|                  | C  | -4.25893000 | -2.50984200 | -0.20326600 |
|                  | C  | -1.72776800 | -3.64541700 | -0.71154100 |
|                  | H  | -0.92819900 | -1.69965600 | -0.34408700 |
|                  | C  | -4.13467900 | -3.87044900 | -0.54201200 |
|                  | C  | -2.89132700 | -4.42703800 | -0.79060400 |
|                  | H  | -0.75433700 | -4.09083400 | -0.88819000 |
|                  | H  | -5.04335100 | -4.46091400 | -0.58158000 |
|                  | H  | -2.81796800 | -5.48262500 | -1.03663900 |
|                  | H  | -1.61774500 | 0.68244700  | -2.58355400 |
|                  | O  | -5.47434300 | -2.03184800 | 0.03321200  |
|                  | B  | -5.70793400 | -0.81291200 | 0.82258100  |
|                  | C  | 3.17354500  | 1.05388500  | -3.31631700 |
|                  | H  | 2.89717000  | 0.15159500  | -3.88110400 |
|                  | H  | 2.62210700  | 1.90464200  | -3.72927900 |
|                  | H  | 4.23855900  | 1.22889300  | -3.46460100 |
|                  | F  | -6.86988300 | -0.19188200 | 0.42243800  |
|                  | F  | -5.68070300 | -1.07623100 | 2.17647900  |
| <b>Complex 3</b> | Br | 7.97225825  | 0.35978619  | -1.24657311 |
|                  | O  | 2.94295403  | -0.62251525 | 1.99369575  |
|                  | F  | -5.66653143 | 0.82369357  | -2.15237091 |
|                  | O  | -5.44944154 | 1.94030817  | -0.08938946 |
|                  | C  | 4.05042918  | -0.39769805 | 1.18959987  |
|                  | F  | -6.79906065 | 0.03963658  | -0.31471697 |
|                  | C  | 1.67790226  | -0.62733895 | 1.46041902  |
|                  | C  | 4.20082128  | 0.79480289  | 0.47843583  |
|                  | H  | 3.41583224  | 1.54316336  | 0.50068900  |
|                  | N  | -2.31964300 | -0.76129852 | 0.12223852  |

## Electronic Supporting information

|   |             |             |             |
|---|-------------|-------------|-------------|
| C | 0.63101110  | -0.47214053 | 2.37731670  |
| H | 0.86963701  | -0.32660102 | 3.42495128  |
| C | 5.36752474  | 1.01761424  | -0.25081162 |
| H | 5.49842515  | 1.93893168  | -0.80643095 |
| C | 5.05763275  | -1.36094489 | 1.18944513  |
| H | 4.91973902  | -2.27356354 | 1.75902823  |
| C | 6.37254278  | 0.05049221  | -0.25032300 |
| N | -4.41343209 | -0.24926559 | -0.39388086 |
| C | 6.22947674  | -1.13536870 | 0.46749707  |
| H | 7.02093662  | -1.87569454 | 0.46141854  |
| C | -0.68627407 | -0.51459465 | 1.93726378  |
| H | -1.50415333 | -0.39749922 | 2.64033477  |
| C | -2.99588132 | -1.97056539 | -0.09158447 |
| C | -3.22013290 | 0.26265574  | -0.07006286 |
| C | 1.40720860  | -0.82804158 | 0.10250759  |
| H | 2.21712766  | -0.96137524 | -0.60454245 |
| C | -4.24394500 | 2.46895586  | 0.07881971  |
| C | -2.56856767 | -3.29556426 | -0.01709973 |
| H | -1.54574820 | -3.54989609 | 0.23713479  |
| C | -0.96142786 | -0.69305951 | 0.57751027  |
| C | -3.04549456 | 1.69186371  | 0.07031577  |
| C | 0.08319227  | -0.85825840 | -0.33340561 |
| H | -0.14134664 | -1.00817154 | -1.38446495 |
| C | -4.31960611 | -1.63179326 | -0.41223837 |

## Electronic Supporting information

|           |   |             |             |             |
|-----------|---|-------------|-------------|-------------|
|           | C | -3.52457583 | -4.27349924 | -0.28277930 |
|           | H | -3.23705292 | -5.31917286 | -0.23750503 |
|           | C | -5.27858968 | -2.61490619 | -0.66858024 |
|           | H | -6.30074120 | -2.33759350 | -0.89286481 |
|           | C | -4.85476393 | -3.93833059 | -0.60214234 |
|           | H | -5.56757666 | -4.73360554 | -0.79540617 |
|           | C | -1.80226609 | 2.34097449  | 0.23112363  |
|           | H | -0.88703464 | 1.76555654  | 0.18816303  |
|           | C | -4.15143750 | 3.85445305  | 0.30960064  |
|           | H | -5.07569076 | 4.42123352  | 0.32825886  |
|           | C | -2.91921517 | 4.46228673  | 0.48115435  |
|           | H | -2.87077517 | 5.53521106  | 0.64395904  |
|           | C | -1.73504523 | 3.70947675  | 0.42956616  |
|           | H | -0.77118456 | 4.19411863  | 0.54396675  |
|           | B | -5.66375801 | 0.66104937  | -0.78301642 |
| Complex 4 | F | 7.88921801  | 1.35869645  | 0.85847134  |
|           | F | -6.23249560 | 2.10453098  | 2.84071113  |
|           | F | 6.77561608  | 2.25920654  | 2.65393614  |
|           | F | -7.71297648 | 2.36999668  | 1.10482988  |
|           | N | 4.11694569  | -0.75752604 | 0.47710227  |
|           | N | 5.64009410  | 0.61921820  | 1.31135153  |
|           | O | 6.11854913  | 2.86782942  | 0.48991991  |
|           | O | -7.23305870 | 0.20761861  | 1.86532285  |
|           | N | -3.80633895 | 0.56167619  | -0.42633554 |



## Electronic Supporting information

|   |             |             |             |
|---|-------------|-------------|-------------|
| N | -0.03189841 | -2.96585739 | -2.51987934 |
| N | -5.54248053 | 1.45609326  | 0.62234142  |
| C | -0.63578825 | -1.22426744 | -1.16025630 |
| C | 0.78320511  | -1.45518510 | -1.00324250 |
| C | 4.83070763  | 0.40177588  | 0.26810937  |
| C | 1.77681303  | -0.85971627 | -0.22264384 |
| H | 1.55439999  | -0.03611068 | 0.44793066  |
| C | -1.53643146 | -0.32236018 | -0.58641182 |
| H | -1.21732569 | 0.40652250  | 0.15158169  |
| C | 5.46467449  | -0.39743934 | 2.23668991  |
| C | -5.15466420 | -0.85531856 | 1.22279998  |
| C | 3.08099368  | -1.33709186 | -0.32910687 |
| C | -1.09626152 | -2.17337697 | -2.11324009 |
| C | 1.11425141  | -2.53563472 | -1.86702366 |
| C | 4.50525056  | -1.28075785 | 1.71809778  |
| C | -4.81127792 | 0.34361209  | 0.48984691  |
| C | -2.87269597 | -0.37931932 | -0.97497096 |
| C | 4.77121003  | 1.34543538  | -0.82700432 |
| C | 3.40094842  | -2.41061767 | -1.18085252 |
| H | 4.42934711  | -2.75254743 | -1.22934599 |
| C | 2.42410747  | -3.01907534 | -1.96162023 |
| H | 2.68461965  | -3.83882706 | -2.62195463 |
| C | 6.05171970  | -0.61523617 | 3.48564059  |
| H | 6.77372041  | 0.08760641  | 3.88151454  |

## Electronic Supporting information

|   |             |             |             |
|---|-------------|-------------|-------------|
| C | 4.09421889  | -2.41769728 | 2.41247699  |
| H | 3.34844599  | -3.09266974 | 2.00780595  |
| C | -6.42660665 | -0.84617676 | 1.87232607  |
| C | -3.92622021 | 1.88150556  | -0.88500436 |
| C | -3.31722592 | -1.30755213 | -1.93524780 |
| H | -4.36394569 | -1.30814558 | -2.21946081 |
| C | -2.43791568 | -2.21768416 | -2.50931176 |
| H | -2.79297955 | -2.92908481 | -3.24667989 |
| C | -4.34594831 | -2.00926432 | 1.30593949  |
| H | -3.36331351 | -2.00927648 | 0.85284820  |
| C | -5.03058984 | 2.43302113  | -0.21694979 |
| C | 5.43405592  | 2.59260307  | -0.61266069 |
| C | 4.68841188  | -2.63761974 | 3.65322795  |
| H | 4.39949860  | -3.51051046 | 4.23005339  |
| C | 4.08520778  | 1.13024127  | -2.04201461 |
| H | 3.61104703  | 0.17594931  | -2.22882768 |
| C | 5.64879457  | -1.75181768 | 4.17937183  |
| H | 6.08015552  | -1.95906129 | 5.15344965  |
| C | -6.86378347 | -2.01607655 | 2.52167515  |
| H | -7.83998087 | -1.99171358 | 2.99313983  |
| C | 5.33182179  | 3.59265579  | -1.59825778 |
| H | 5.82951765  | 4.53666228  | -1.40601235 |
| C | 4.63896066  | 3.35920426  | -2.77396503 |
| H | 4.58547071  | 4.14058328  | -3.52671426 |

## Electronic Supporting information

|           |   |             |             |             |
|-----------|---|-------------|-------------|-------------|
|           | C | -6.05705191 | -3.14043041 | 2.57191898  |
|           | H | -6.40840152 | -4.02700384 | 3.09210958  |
|           | C | -4.78582717 | -3.13851493 | 1.97536672  |
|           | H | -4.14842375 | -4.01416476 | 2.03847173  |
|           | C | 4.02158629  | 2.11989496  | -3.00803873 |
|           | H | 3.49746026  | 1.93496098  | -3.93981033 |
|           | C | -0.09221425 | -4.01867772 | -3.52818578 |
|           | H | -1.07299580 | -4.49714295 | -3.45011524 |
|           | H | 0.64356405  | -4.78148993 | -3.25649554 |
|           | C | -3.18612376 | 2.60940593  | -1.81569955 |
|           | H | -2.33716715 | 2.17572038  | -2.33206409 |
|           | B | 6.68763978  | 1.82113077  | 1.35256488  |
|           | C | -3.59489411 | 3.92089337  | -2.04763325 |
|           | H | -3.04656096 | 4.52635798  | -2.76236424 |
|           | C | -5.44440176 | 3.74528377  | -0.45896544 |
|           | H | -6.31131835 | 4.14861487  | 0.04875008  |
|           | C | -4.70387032 | 4.47750748  | -1.38132196 |
|           | H | -4.98985808 | 5.50188142  | -1.59745426 |
|           | B | -6.73879958 | 1.57989988  | 1.67094545  |
|           | C | 0.15237145  | -3.51255221 | -4.95250724 |
|           | H | 1.14126852  | -3.05407458 | -5.04178198 |
|           | H | -0.59494826 | -2.76674566 | -5.23772428 |
|           | H | 0.09496021  | -4.34360897 | -5.66204728 |
| Complex 5 | C | -1.20305000 | -0.37450400 | -2.22376300 |

## Electronic Supporting information

|   |             |             |             |
|---|-------------|-------------|-------------|
| C | -1.25916800 | 0.44726000  | -1.07578500 |
| C | -2.47090600 | 0.73578600  | -0.46348900 |
| C | -3.66480800 | 0.22382100  | -0.98207900 |
| C | -3.63134700 | -0.56455100 | -2.13129500 |
| C | -2.41783400 | -0.87007200 | -2.74106700 |
| H | -0.34770000 | 0.87065000  | -0.67165000 |
| H | -2.49713300 | 1.36687700  | 0.41914000  |
| H | -2.42547600 | -1.50096800 | -3.62045300 |
| N | 0.01317800  | -0.63484800 | -2.86460100 |
| C | 1.24910000  | -0.61108900 | -2.16553100 |
| C | 1.38858700  | -1.22044000 | -0.90747900 |
| C | 2.37202100  | -0.00137400 | -2.74922000 |
| C | 2.61355400  | -1.20772500 | -0.24596500 |
| H | 0.53394000  | -1.70613700 | -0.44977700 |
| C | 3.60415000  | -0.01296500 | -2.10323700 |
| H | 2.27536300  | 0.49136700  | -3.71101600 |
| C | 3.72289600  | -0.60325300 | -0.84269200 |
| H | 2.71678400  | -1.67584100 | 0.72759400  |
| H | 4.46882700  | 0.45620400  | -2.56056300 |
| N | -4.91600500 | 0.55670400  | -0.36660500 |
| C | -5.71871100 | -0.22245400 | 0.43616800  |
| C | -5.59387000 | 1.75973400  | -0.60789800 |
| C | -6.81877800 | 1.66702200  | 0.07098300  |
| N | -6.85311000 | 0.43493700  | 0.70443500  |

## Electronic Supporting information

|   |             |             |             |
|---|-------------|-------------|-------------|
| C | -5.24686800 | 2.88295000  | -1.35743400 |
| C | -7.75599900 | 2.70200100  | 0.02202700  |
| C | -6.17894300 | 3.91764100  | -1.39622300 |
| C | -7.41066100 | 3.82764100  | -0.71900300 |
| H | -5.95122500 | 4.81272800  | -1.96646200 |
| H | -8.10943600 | 4.65567200  | -0.78216800 |
| H | -4.30101700 | 2.94479000  | -1.88379800 |
| H | -8.70551500 | 2.60576000  | 0.53308800  |
| C | -5.50931400 | -1.56372100 | 0.93667300  |
| C | -4.28890500 | -2.26949400 | 0.86638900  |
| C | -6.65264400 | -2.20297800 | 1.50599700  |
| C | -4.19759300 | -3.57786700 | 1.30993400  |
| H | -3.40897000 | -1.77955200 | 0.47094800  |
| C | -6.54176500 | -3.54254300 | 1.92432600  |
| C | -5.33587700 | -4.21615100 | 1.82822100  |
| H | -3.25015200 | -4.10387600 | 1.25686300  |
| H | -7.42718800 | -4.01215200 | 2.33825200  |
| H | -5.26974400 | -5.24484200 | 2.17096300  |
| H | -4.55691600 | -0.95489800 | -2.54176900 |
| O | -7.82909700 | -1.60222600 | 1.63111500  |
| B | -7.96962800 | -0.13882100 | 1.68791500  |
| C | -0.00350800 | -1.22436300 | -4.20264900 |
| H | -0.35464600 | -2.26585100 | -4.18965900 |
| H | -0.64933100 | -0.64664500 | -4.87072000 |

## Electronic Supporting information

|   |             |             |             |
|---|-------------|-------------|-------------|
| H | 1.00656400  | -1.21990300 | -4.60914000 |
| F | -9.19767000 | 0.24943100  | 1.20268000  |
| F | -7.71549800 | 0.34346900  | 2.95443300  |
| C | 5.82388700  | -1.77006300 | -0.18014900 |
| C | 5.68769400  | 0.39134200  | 0.41454300  |
| C | 7.02581600  | -1.37596500 | 0.42814800  |
| C | 5.62953100  | -3.06270000 | -0.66487000 |
| C | 8.09177700  | -2.26711200 | 0.57395800  |
| C | 6.69061500  | -3.95208000 | -0.50892200 |
| H | 4.70126600  | -3.35933000 | -1.14008200 |
| C | 7.89895900  | -3.56049200 | 0.09918600  |
| H | 9.02007400  | -1.94120000 | 1.02565600  |
| H | 6.58357200  | -4.97019900 | -0.86955700 |
| H | 8.70121500  | -4.28517700 | 0.19408500  |
| C | 5.30138200  | 1.76822200  | 0.62900500  |
| C | 3.99384300  | 2.27424100  | 0.46520600  |
| C | 6.35257100  | 2.65898900  | 1.00518800  |
| C | 3.72860200  | 3.62330700  | 0.62608600  |
| H | 3.18356600  | 1.59845100  | 0.22441500  |
| C | 6.06393500  | 4.03072200  | 1.13377200  |
| C | 4.77552600  | 4.50251300  | 0.94770300  |
| H | 2.71680300  | 3.99582300  | 0.50596800  |
| H | 6.88089900  | 4.69110500  | 1.40255300  |
| H | 4.57251400  | 5.56283900  | 1.06764600  |

## Electronic Supporting information

|           |   |             |             |             |
|-----------|---|-------------|-------------|-------------|
|           | N | 4.99376100  | -0.63907200 | -0.18164700 |
|           | N | 6.89786300  | -0.04249300 | 0.78334400  |
|           | O | 7.60040900  | 2.25669500  | 1.20895800  |
|           | B | 7.93271500  | 0.87320000  | 1.58342000  |
|           | F | 7.74485700  | 0.65533800  | 2.93112000  |
|           | F | 9.19874900  | 0.54560900  | 1.15613600  |
| Complex 6 | F | -0.44402900 | 8.39196800  | -2.29553300 |
|           | F | 1.60921000  | 8.41976700  | -1.26604100 |
|           | O | 0.00000000  | 0.00000000  | 3.20413300  |
|           | N | -0.18502200 | 5.03882600  | 0.79817500  |
|           | N | 0.00000000  | 6.75509600  | -0.59160400 |
|           | O | 1.08876500  | 6.68747000  | -2.77578900 |
|           | C | 0.44842200  | 5.52355200  | -0.32533200 |
|           | C | -0.11358800 | 3.72879600  | 1.37487900  |
|           | C | 0.60102600  | 3.53104100  | 2.55935800  |
|           | H | 1.12696800  | 4.36363800  | 3.01462700  |
|           | C | 1.42004700  | 4.88963500  | -1.18868100 |
|           | C | -1.07440400 | 6.02629900  | 1.24715700  |
|           | C | -0.02800100 | 1.20306300  | 2.53222400  |
|           | C | 0.64787700  | 2.26538700  | 3.13762900  |
|           | H | 1.19905100  | 2.08540400  | 4.05379500  |
|           | C | -0.80233200 | 2.66733600  | 0.78212900  |
|           | H | -1.37031600 | 2.83724600  | -0.12639500 |
|           | C | -0.95001600 | 7.10317900  | 0.35565600  |

## Electronic Supporting information

|   |             |             |             |
|---|-------------|-------------|-------------|
| C | -0.76055000 | 1.39962200  | 1.35672800  |
| H | -1.29937800 | 0.57585700  | 0.90303700  |
| C | 2.09860600  | 3.68721600  | -0.89435700 |
| H | 1.95552600  | 3.21194100  | 0.06733300  |
| C | -1.96244700 | 6.05374600  | 2.32147900  |
| H | -2.05866300 | 5.21591600  | 3.00290200  |
| C | 1.66235700  | 5.54016400  | -2.43698000 |
| C | -1.71974900 | 8.25969900  | 0.50290300  |
| H | -1.62779200 | 9.07262500  | -0.20609600 |
| C | -2.72151900 | 7.21239200  | 2.47154000  |
| H | -3.42546700 | 7.27938900  | 3.29495700  |
| C | 2.96217300  | 3.11553400  | -1.81290900 |
| H | 3.48517000  | 2.19706300  | -1.56803900 |
| C | -2.60184100 | 8.29450100  | 1.57814000  |
| H | -3.21809600 | 9.17482300  | 1.72998200  |
| C | 2.52123600  | 4.92352400  | -3.36637900 |
| H | 2.67614600  | 5.42593300  | -4.31472200 |
| B | 0.58956900  | 7.64642200  | -1.77767300 |
| C | 3.15890200  | 3.73371400  | -3.05857400 |
| H | 3.82987800  | 3.28387400  | -3.78472600 |
| F | 0.44402900  | -8.39196800 | -2.29553300 |
| F | -1.60921000 | -8.41976700 | -1.26604100 |
| N | 0.18502200  | -5.03882600 | 0.79817500  |
| N | 0.00000000  | -6.75509600 | -0.59160400 |



## Electronic Supporting information

|   |             |             |             |
|---|-------------|-------------|-------------|
| O | -1.08876500 | -6.68747000 | -2.77578900 |
| C | -0.44842200 | -5.52355200 | -0.32533200 |
| C | 0.11358800  | -3.72879600 | 1.37487900  |
| C | -0.60102600 | -3.53104100 | 2.55935800  |
| H | -1.12696800 | -4.36363800 | 3.01462700  |
| C | -1.42004700 | -4.88963500 | -1.18868100 |
| C | 1.07440400  | -6.02629900 | 1.24715700  |
| C | 0.02800100  | -1.20306300 | 2.53222400  |
| C | -0.64787700 | -2.26538700 | 3.13762900  |
| H | -1.19905100 | -2.08540400 | 4.05379500  |
| C | 0.80233200  | -2.66733600 | 0.78212900  |
| H | 1.37031600  | -2.83724600 | -0.12639500 |
| C | 0.95001600  | -7.10317900 | 0.35565600  |
| C | 0.76055000  | -1.39962200 | 1.35672800  |
| H | 1.29937800  | -0.57585700 | 0.90303700  |
| C | -2.09860600 | -3.68721600 | -0.89435700 |
| H | -1.95552600 | -3.21194100 | 0.06733300  |
| C | 1.96244700  | -6.05374600 | 2.32147900  |
| H | 2.05866300  | -5.21591600 | 3.00290200  |
| C | -1.66235700 | -5.54016400 | -2.43698000 |
| C | 1.71974900  | -8.25969900 | 0.50290300  |
| H | 1.62779200  | -9.07262500 | -0.20609600 |
| C | 2.72151900  | -7.21239200 | 2.47154000  |
| H | 3.42546700  | -7.27938900 | 3.29495700  |

Electronic Supporting information

|   |             |             |             |
|---|-------------|-------------|-------------|
| C | -2.96217300 | -3.11553400 | -1.81290900 |
| H | -3.48517000 | -2.19706300 | -1.56803900 |
| C | 2.60184100  | -8.29450100 | 1.57814000  |
| H | 3.21809600  | -9.17482300 | 1.72998200  |
| C | -2.52123600 | -4.92352400 | -3.36637900 |
| H | -2.67614600 | -5.42593300 | -4.31472200 |
| B | -0.58956900 | -7.64642200 | -1.77767300 |
| C | -3.15890200 | -3.73371400 | -3.05857400 |
| H | -3.82987800 | -3.28387400 | -3.78472600 |
